# Supplementary material for: Long-Term Projections of Cancer Incidence and Mortality in Japan and Decomposition Analysis of Changes in Cancer Burden, 2020–2054: An Empirical Validation Approach
Source: MDPI journal article supplement (doi:10.3390/cancers14246076), 2022-12-09
Supplement: s1 [file s1]

## Supplementary

**Title:** Long-term projections of cancer incidence and mortality in Japan and decomposition analysis of changes in cancer burden, 2020–2054: An empirical validation approach

### Table of Contents

|                                                                                                                                                              |    |
|--------------------------------------------------------------------------------------------------------------------------------------------------------------|----|
| Table S1: Information of empirically selected models with data-, gender- and site-specific parameters .....                                                  | 2  |
| Table S2: Observed and projected new cancer cases and deaths in 2015–2019 and 2050–2054 by age groups and genders .....                                      | 4  |
| Table S3: Cancer incidence by genders and decomposed changes in cases over 2020–2054 for other cancers .....                                                 | 5  |
| Table S4: Observed and projected top burden of cancer in Japan by genders and age groups .....                                                               | 6  |
| Table S5: Cancer mortality by genders and decomposed changes in deaths over 2020–2054 for other cancers .....                                                | 9  |
| Figure S1: Trend in and projection of total population, proportions of people aged 65+ and 85+, and population pyramids in Japan, 1985–2055 .....            | 10 |
| Figure S2: Projections of age-specific incidence and mortality rates and decomposed changes in new cases and deaths — Stomach .....                          | 11 |
| Figure S3: Projections of age-specific incidence and mortality rates and decomposed changes in new cases and deaths — Colon/rectum .....                     | 12 |
| Figure S4: Projections of age-specific incidence and mortality rates and decomposed changes in new cases and deaths — Liver .....                            | 13 |
| Figure S5: Projections of age-specific incidence and mortality rates and decomposed changes in new cases and deaths — Pancreas .....                         | 14 |
| Figure S6: Projections of age-specific incidence and mortality rates and decomposed changes in new cases and deaths — Lung, trachea .....                    | 15 |
| Figure S7: Projections of age-specific incidence and mortality rates and decomposed changes in new cases and deaths — Prostate .....                         | 16 |
| Figure S8: Projections of age-specific incidence and mortality rates and decomposed changes in new cases and deaths — Female breast .....                    | 17 |
| Figure S9: Projections of age-specific incidence and mortality rates and decomposed changes in new cases and deaths — Cervix uteri .....                     | 18 |
| Figure S10: Projections of age-specific incidence and mortality rates and decomposed changes in new cases and deaths — Corpus uteri .....                    | 19 |
| Figure S11: Projections of age-specific incidence and mortality rates and decomposed changes in new cases and deaths — Esophagus .....                       | 20 |
| Figure S12: Projections of age-specific incidence and mortality rates and decomposed changes in new cases and deaths — Gallbladder and bile ducts .....      | 21 |
| Figure S13: Projections of age-specific incidence and mortality rates and decomposed changes in new cases and deaths — Bladder .....                         | 22 |
| Figure S14: Projections of age-specific incidence and mortality rates and decomposed changes in new cases and deaths — Kidney and other urinary organs ..... | 23 |
| Figure S15: Projections of age-specific incidence and mortality rates and decomposed changes in new cases and deaths — Thyroid .....                         | 24 |
| Figure S16: Projections of age-specific incidence and mortality rates and decomposed changes in new cases and deaths — Malignant lymphoma .....              | 25 |
| Figure S17: Projections of age-specific incidence and mortality rates and decomposed changes in new cases and deaths — Ovary .....                           | 26 |
| Figure S18: Projections of age-specific incidence and mortality rates and decomposed changes in new cases and deaths — Oral cavity and pharynx .....         | 27 |
| Figure S19: Projections of age-specific incidence and mortality rates and decomposed changes in new cases and deaths — Larynx .....                          | 28 |
| Figure S20: Projections of age-specific incidence and mortality rates and decomposed changes in new cases and deaths — Skin .....                            | 29 |
| Figure S21: Projections of age-specific incidence and mortality rates and decomposed changes in new cases and deaths — Brain, nervous system .....           | 30 |
| Figure S22: Projections of age-specific incidence and mortality rates and decomposed changes in new cases and deaths — Multiple myeloma ..                   | 31 |
| Figure S23: Projections of age-specific incidence and mortality rates and decomposed changes in new cases and deaths — Leukemia .....                        | 32 |
| Figure S24: Projections of age-standardized incidence and mortality rates by genders for other cancer sites .....                                            | 33 |
| Figure S25: Projections of new cancer cases by genders for all cancer sites .....                                                                            | 34 |
| Figure S26: Sensitivity analysis of drift attenuation in ASR in 2050–2054 .....                                                                              | 35 |
| Figure S27: Projections of new cancer deaths by genders for all cancer sites .....                                                                           | 36 |

**Table S1. Information of empirically selected models with data-, gender- and site-specific parameters.**

| Data      | Gender | Cancer group | Cancer site                     | ICD-10      | Model (link function) | Annual attenuating drift (%) | Use of recent trend | Start included age (years) | Absolute relative bias (%) |
|-----------|--------|--------------|---------------------------------|-------------|-----------------------|------------------------------|---------------------|----------------------------|----------------------------|
| Incidence | Male   | Major        | Stomach                         | C16         | Poisson               | 6%                           | YES                 | 15                         | 5.58                       |
|           |        |              | Colon/rectum                    | C18–C20     | Power 3               | 7%                           | YES                 | 15                         | 0.14                       |
|           |        |              | Liver                           | C22         | Power 3               | 6%                           | YES                 | 20                         | 0.03                       |
|           |        |              | Pancreas                        | C25         | Power 4               | 10%                          | YES                 | 25                         | 1.45                       |
|           |        |              | Lung, trachea                   | C33–C34     | Poisson               | 10%                          | NO                  | 20                         | 0.16                       |
|           |        |              | Prostate                        | C61         | Power 5               | 10%                          | YES                 | 40                         | 1.29                       |
|           |        | Sub–major    | Esophagus                       | C15         | Power 5               | 6%                           | NO                  | 35                         | 0.27                       |
|           |        |              | Gallbladder and bile ducts      | C23–C24     | Power 7               | 10%                          | NO                  | 30                         | 0.02                       |
|           |        |              | Bladder                         | C67         | Power 3               | 10%                          | YES                 | 25                         | 0.78                       |
|           |        |              | Kidney and other urinary organs | C64–C66 C68 | Power 4               | 10%                          | YES                 | 20                         | 0.43                       |
|           |        |              | Thyroid                         | C73         | Power 4               | 9%                           | NO                  | 20                         | 2.01                       |
|           |        |              | Malignant lymphoma              | C81–C85 C96 | Power 3               | 7%                           | YES                 | 0                          | 0.17                       |
|           |        | Others       | Oral cavity and pharynx         | C00–C14     | Power 7               | 10%                          | YES                 | 10                         | 0.55                       |
|           |        |              | Larynx                          | C32         | Poisson               | 10%                          | YES                 | 35                         | 2.05                       |
|           |        |              | Skin                            | C43–C44     | Power 3               | 10%                          | NO                  | 25                         | 1.11                       |
|           |        |              | Brain, nervous system           | C70–C72     | Power 4               | 10%                          | YES                 | 0                          | 0.04                       |
|           |        |              | Multiple myeloma                | C88–C90     | Power 4               | 10%                          | YES                 | 35                         | 0.14                       |
|           |        |              | Leukemia                        | C91–C95     | Poisson               | 10%                          | YES                 | 0                          | 0.82                       |
|           | Female | Major        | Stomach                         | C16         | Poisson               | 10%                          | YES                 | 15                         | 2.47                       |
|           |        |              | Colon/rectum                    | C18–C20     | Poisson               | 10%                          | YES                 | 15                         | 0.06                       |
|           |        |              | Liver                           | C22         | Power 7               | 10%                          | YES                 | 25                         | 0.22                       |
|           |        |              | Pancreas                        | C25         | Power 3               | 10%                          | NO                  | 30                         | 0.66                       |
|           |        |              | Lung, trachea                   | C33–C34     | Power 4               | 8%                           | NO                  | 25                         | 0.11                       |
|           |        |              | Female breast                   | C50         | Poisson               | 7%                           | YES                 | 20                         | 0.31                       |
|           |        | Sub–major    | Cervix uteri                    | C53         | Poisson               | 10%                          | YES                 | 20                         | 0.10                       |
|           |        |              | Corpus uteri                    | C54         | Poisson               | 7%                           | NO                  | 25                         | 0.37                       |
|           |        |              | Esophagus                       | C15         | Power 3               | 9%                           | NO                  | 40                         | 1.64                       |
|           |        |              | Gallbladder and bile ducts      | C23–C24     | Poisson               | 10%                          | YES                 | 30                         | 0.34                       |
|           |        |              | Bladder                         | C67         | Power 3               | 10%                          | NO                  | 30                         | 1.24                       |
|           |        |              | Kidney and other urinary organs | C64–C66 C68 | Power 3               | 6%                           | YES                 | 20                         | 0.01                       |
|           |        |              | Thyroid                         | C73         | Power 3               | 10%                          | NO                  | 10                         | 4.71                       |
|           |        |              | Malignant lymphoma              | C81–C85 C96 | Power 7               | 8%                           | YES                 | 0                          | 3.00                       |
|           |        |              | Ovary                           | C56         | Poisson               | 8%                           | NO                  | 5                          | 0.11                       |
|           |        | Others       | Oral cavity and pharynx         | C00–C14     | Poisson               | 6%                           | NO                  | 15                         | 4.71                       |
|           |        |              | Larynx                          | C32         | Power 3               | 10%                          | NO                  | 40                         | 6.75                       |
|           |        |              | Skin                            | C43–C44     | Power 3               | 10%                          | NO                  | 15                         | 2.18                       |
|           |        |              | Brain, nervous system           | C70–C72     | Power 3               | 8%                           | NO                  | 0                          | 0.16                       |
|           |        |              | Multiple myeloma                | C88–C90     | Poisson               | 7%                           | NO                  | 35                         | 1.28                       |
|           |        |              | Leukemia                        | C91–C95     | Poisson               | 10%                          | YES                 | 0                          | 0.19                       |
| Mortality | Male   | Major        | Stomach                         | C16         | Power 4               | 10%                          | YES                 | 20                         | 0.08                       |
|           |        |              | Colon/rectum                    | C18–C20     | Power 6               | 10%                          | YES                 | 20                         | 0.02                       |

| Data | Gender | Cancer group | Cancer site                     | ICD-10      | Model (link function) | Annual attenuating drift (%) | Use of recent trend | Start included age (years) | Absolute relative bias (%) |
|------|--------|--------------|---------------------------------|-------------|-----------------------|------------------------------|---------------------|----------------------------|----------------------------|
|      |        |              | Liver                           | C22         | Power 3               | 10%                          | YES                 | 25                         | 7.36                       |
|      |        |              | Pancreas                        | C25         | Poisson               | 10%                          | NO                  | 25                         | 1.06                       |
|      |        |              | Lung, trachea                   | C33–C34     | Power 6               | 10%                          | YES                 | 25                         | 0.33                       |
|      |        |              | Prostate                        | C61         | Power 5               | 10%                          | NO                  | 40                         | 0.21                       |
|      |        | Sub–major    | Esophagus                       | C15         | Power 3               | 10%                          | YES                 | 35                         | 0.04                       |
|      |        |              | Gallbladder and bile ducts      | C23–C24     | Power 3               | 6%                           | YES                 | 30                         | 3.62                       |
|      |        |              | Bladder                         | C67         | Power 3               | 6%                           | YES                 | 35                         | 3.75                       |
|      |        |              | Kidney and other urinary organs | C64–C66 C68 | Power 4               | 7%                           | YES                 | 25                         | 0.06                       |
|      |        |              | Thyroid                         | C73         | Power 3               | 6%                           | NO                  | 40                         | 0.26                       |
|      |        |              | Malignant lymphoma              | C81–C85 C96 | Poisson               | 10%                          | YES                 | 10                         | 0.11                       |
|      |        | Others       | Oral cavity and pharynx         | C00–C14     | Poisson               | 10%                          | YES                 | 20                         | 0.02                       |
|      |        |              | Larynx                          | C32         | Power 3               | 10%                          | YES                 | 40                         | 3.32                       |
|      |        |              | Skin                            | C43–C44     | Power 3               | 10%                          | YES                 | 30                         | 0.07                       |
|      |        |              | Brain, nervous system           | C70–C72     | Poisson               | 10%                          | YES                 | 0                          | 0.02                       |
|      |        |              | Multiple myeloma                | C88–C90     | Power 3               | 10%                          | YES                 | 35                         | 0.06                       |
|      |        |              | Leukemia                        | C91–C95     | Power 4               | 9%                           | YES                 | 0                          | 0.02                       |
|      | Female | Major        | Stomach                         | C16         | Power 7               | 9%                           | NO                  | 20                         | 0.00                       |
|      |        |              | Colon/rectum                    | C18–C20     | Power 4               | 6%                           | YES                 | 20                         | 0.00                       |
|      |        |              | Liver                           | C22         | Power 7               | 10%                          | YES                 | 25                         | 2.96                       |
|      |        |              | Pancreas                        | C25         | Power 3               | 7%                           | YES                 | 30                         | 0.17                       |
|      |        |              | Lung, trachea                   | C33–C34     | Power 5               | 8%                           | NO                  | 25                         | 0.12                       |
|      |        |              | Female breast                   | C50         | Poisson               | 6%                           | NO                  | 25                         | 1.73                       |
|      |        |              | Cervix uteri                    | C53         | Power 3               | 8%                           | NO                  | 25                         | 0.10                       |
|      |        |              | Corpus uteri                    | C54         | Poisson               | 6%                           | YES                 | 35                         | 0.10                       |
|      |        | Sub–major    | Esophagus                       | C15         | Power 5               | 10%                          | YES                 | 40                         | 0.06                       |
|      |        |              | Gallbladder and bile ducts      | C23–C24     | Power 5               | 10%                          | NO                  | 35                         | 0.15                       |
|      |        |              | Bladder                         | C67         | Power 5               | 6%                           | YES                 | 40                         | 2.92                       |
|      |        |              | Kidney and other urinary organs | C64–C66 C68 | Poisson               | 8%                           | YES                 | 30                         | 1.67                       |
|      |        |              | Thyroid                         | C73         | Power 4               | 7%                           | NO                  | 40                         | 0.02                       |
|      |        |              | Malignant lymphoma              | C81–C85 C96 | Poisson               | 10%                          | NO                  | 15                         | 1.12                       |
|      |        |              | Ovary                           | C56         | Poisson               | 10%                          | YES                 | 15                         | 1.95                       |
|      |        | Others       | Oral cavity and pharynx         | C00–C14     | Power 3               | 8%                           | NO                  | 25                         | 0.04                       |
|      |        |              | Larynx                          | C32         | Power 4               | 8%                           | NO                  | 40                         | 0.11                       |
|      |        |              | Skin                            | C43–C44     | Power 3               | 10%                          | YES                 | 30                         | 2.38                       |
|      |        |              | Brain, nervous system           | C70–C72     | Power 5               | 6%                           | YES                 | 0                          | 2.33                       |
|      |        |              | Multiple myeloma                | C88–C90     | Poisson               | 10%                          | YES                 | 40                         | 0.85                       |
|      |        |              | Leukemia                        | C91–C95     | Power 4               | 6%                           | YES                 | 0                          | 0.22                       |

**Table S2. Observed and projected new cancer cases and deaths in 2015–2019 and 2050–2054 by age groups and genders.**

| Gender | Age group                  | Period 2015–2019 |                 |                   | Period 2050–2054 |                 |                   |
|--------|----------------------------|------------------|-----------------|-------------------|------------------|-----------------|-------------------|
|        |                            | Case (%)         | Death (%)       | Population (%)    | Case (%)         | Death (%)       | Population (%)    |
| All    | Oldest-old (85+ years)     | 131201 (14.01%)  | 96620 (27.21%)  | 5442300 (4.30%)   | 284090 (25.88%)  | 124876 (40.57%) | 9764411 (9.75%)   |
|        | Middle-old (75–84 years)   | 277365 (29.61%)  | 121094 (34.10%) | 11992347 (9.47%)  | 366481 (33.39%)  | 108585 (35.27%) | 14615368 (14.60%) |
|        | Youngest-old (65–74 years) | 290573 (31.03%)  | 89087 (25.09%)  | 17579346 (13.88%) | 237173 (21.61%)  | 47220 (15.34%)  | 13529580 (13.51%) |
|        | Middle-adult (40–64 years) | 217183 (23.19%)  | 46082 (12.98%)  | 42505899 (33.56%) | 191468 (17.44%)  | 25877 (8.41%)   | 29181164 (29.14%) |
|        | Young-adult (20–39 years)  | 17937 (1.92%)    | 1913 (0.54%)    | 27596730 (21.79%) | 15912 (1.45%)    | 1054 (0.34%)    | 18589711 (18.56%) |
|        | Adolescent (15–19 years)   | 721 (0.08%)      | 77 (0.02%)      | 5963683 (4.71%)   | 740 (0.07%)      | 61 (0.02%)      | 3943462 (3.94%)   |
|        | Children (0–14 years)      | 1590 (0.17%)     | 195 (0.05%)     | 15589044 (12.31%) | 1702 (0.16%)     | 167 (0.05%)     | 10510108 (10.50%) |
| Male   | Oldest-old (85+ years)     | 63836 (11.95%)   | 46833 (22.23%)  | 1666348 (2.70%)   | 139971 (24.51%)  | 62299 (35.44%)  | 3407040 (7.04%)   |
|        | Middle-old (75–84 years)   | 174975 (32.75%)  | 76752 (36.44%)  | 5145840 (8.35%)   | 217994 (38.17%)  | 67945 (38.65%)  | 6658062 (13.76%)  |
|        | Youngest-old (65–74 years) | 189144 (35.40%)  | 59998 (28.48%)  | 8381733 (13.60%)  | 135917 (23.80%)  | 30603 (17.41%)  | 6586967 (13.62%)  |
|        | Middle-adult (40–64 years) | 100460 (18.80%)  | 26132 (12.41%)  | 21316860 (34.58%) | 71788 (12.57%)   | 14470 (8.23%)   | 14813800 (30.62%) |
|        | Young-adult (20–39 years)  | 4731 (0.89%)     | 786 (0.37%)     | 14085399 (22.85%) | 4035 (0.71%)     | 360 (0.20%)     | 9507695 (19.65%)  |
|        | Adolescent (15–19 years)   | 317 (0.06%)      | 45 (0.02%)      | 3062278 (4.97%)   | 374 (0.07%)      | 35 (0.02%)      | 2019199 (4.17%)   |
|        | Children (0–14 years)      | 863 (0.16%)      | 107 (0.05%)     | 7982089 (12.95%)  | 984 (0.17%)      | 84 (0.05%)      | 5386595 (11.13%)  |
| Female | Oldest-old (85+ years)     | 67365 (16.75%)   | 49787 (34.47%)  | 3775952 (5.81%)   | 144119 (27.37%)  | 62576 (47.39%)  | 6357370 (12.28%)  |
|        | Middle-old (75–84 years)   | 102390 (25.45%)  | 44342 (30.70%)  | 6846507 (10.53%)  | 148487 (28.20%)  | 40639 (30.78%)  | 7957305 (15.38%)  |
|        | Youngest-old (65–74 years) | 101430 (25.22%)  | 29090 (20.14%)  | 9197614 (14.14%)  | 101256 (19.23%)  | 16617 (12.58%)  | 6942612 (13.41%)  |
|        | Middle-adult (40–64 years) | 116723 (29.02%)  | 19950 (13.81%)  | 21189038 (32.58%) | 119680 (22.73%)  | 11407 (8.64%)   | 14367367 (27.76%) |
|        | Young-adult (20–39 years)  | 13205 (3.28%)    | 1128 (0.78%)    | 13511331 (20.78%) | 11877 (2.26%)    | 694 (0.53%)     | 9082015 (17.55%)  |
|        | Adolescent (15–19 years)   | 404 (0.10%)      | 32 (0.02%)      | 2901405 (4.46%)   | 366 (0.07%)      | 26 (0.02%)      | 1924262 (3.72%)   |
|        | Children (0–14 years)      | 727 (0.18%)      | 88 (0.06%)      | 7606954 (11.70%)  | 718 (0.14%)      | 83 (0.06%)      | 5123514 (9.90%)   |

%; Proportion to the total number of all-age combined.

**Table S3. Cancer incidence by genders and decomposed changes in cases over 2020–2054 for other cancers.**

| Gender                   | Cancer Site             | ICD-10  | Period 2015–2019 <sup>a</sup> |                   |      | Period 2050–2054 <sup>a</sup> |                   |      | Case changes over period 2020–2054 |                                  |                                           |                                  |
|--------------------------|-------------------------|---------|-------------------------------|-------------------|------|-------------------------------|-------------------|------|------------------------------------|----------------------------------|-------------------------------------------|----------------------------------|
|                          |                         |         | Case                          | Rate <sup>b</sup> | Rank | Case                          | Rate <sup>b</sup> | Rank | Total (%)                          | Population risk (%) <sup>c</sup> | Population age structure (%) <sup>d</sup> | Population size (%) <sup>e</sup> |
| Male and female combined | Oral cavity and pharynx | C00–C14 | 21660                         | 9.4               | 14   | 31140                         | 13.2              | 10   | +9480 (+43.8%)                     | +9360 (+43.2%)                   | +6485 (+29.9%)                            | -6364 (-29.4%)                   |
|                          | Larynx                  | C32     | 5267                          | 2.0               | 22   | 3973                          | 1.4               | 22   | -1294 (-24.6%)                     | -1620 (-30.8%)                   | +1445 (+27.4%)                            | -1119 (-21.2%)                   |
|                          | Skin                    | C43–C44 | 23727                         | 7.7               | 11   | 30508                         | 7.5               | 11   | +6781 (+28.6%)                     | +832 (+3.5%)                     | +12446 (+52.5%)                           | -6497 (-27.4%)                   |
|                          | Brain, nervous system   | C70–C72 | 5913                          | 3.4               | 21   | 6980                          | 4.5               | 21   | +1067 (+18.0%)                     | +1576 (+26.7%)                   | +1041 (+17.6%)                            | -1550 (-26.2%)                   |
|                          | Multiple myeloma        | C88–C90 | 7578                          | 2.6               | 20   | 10580                         | 3.5               | 19   | +3002 (+39.6%)                     | +2178 (+28.7%)                   | +3004 (+39.6%)                            | -2180 (-28.8%)                   |
|                          | Leukemia                | C91–C95 | 13717                         | 7.1               | 17   | 16662                         | 9.1               | 18   | +2945 (+21.5%)                     | +3243 (+23.6%)                   | +3357 (+24.5%)                            | -3655 (-26.6%)                   |
| Male                     | Oral cavity and pharynx | C00–C14 | 15063                         | 12.6              | 11   | 19680                         | 15.6              | 9    | +4617 (+30.7%)                     | +4616 (+30.6%)                   | +4255 (+28.2%)                            | -4254 (-28.2%)                   |
|                          | Larynx                  | C32     | 4859                          | 3.4               | 15   | 3443                          | 2.2               | 18   | -1416 (-29.1%)                     | -1743 (-35.9%)                   | +1338 (+27.5%)                            | -1011 (-20.8%)                   |
|                          | Skin                    | C43–C44 | 12076                         | 7.8               | 12   | 14173                         | 7.1               | 12   | +2097 (+17.4%)                     | -1103 (-9.1%)                    | +6453 (+53.4%)                            | -3253 (-26.9%)                   |
|                          | Brain, nervous system   | C70–C72 | 3177                          | 3.7               | 18   | 4237                          | 5.6               | 17   | +1060 (+33.4%)                     | +1356 (+42.7%)                   | +623 (+19.6%)                             | -919 (-28.9%)                    |
|                          | Multiple myeloma        | C88–C90 | 4000                          | 2.8               | 17   | 5185                          | 3.3               | 16   | +1185 (+29.6%)                     | +622 (+15.6%)                    | +1697 (+42.4%)                            | -1134 (-28.3%)                   |
|                          | Leukemia                | C91–C95 | 8016                          | 8.1               | 14   | 9857                          | 10.4              | 14   | +1841 (+23.0%)                     | +1890 (+23.6%)                   | +2156 (+26.9%)                            | -2205 (-27.5%)                   |
| Female                   | Oral cavity and pharynx | C00–C14 | 6597                          | 5.6               | 15   | 11460                         | 10.0              | 12   | +4863 (+73.7%)                     | +4743 (+71.9%)                   | +2230 (+33.8%)                            | -2110 (-32.0%)                   |
|                          | Larynx                  | C32     | 408                           | 0.3               | 21   | 529                           | 0.4               | 21   | +121 (+29.7%)                      | +123 (+30.1%)                    | +107 (+26.2%)                             | -108 (-26.5%)                    |
|                          | Skin                    | C43–C44 | 11651                         | 7.3               | 11   | 16335                         | 7.8               | 9    | +4684 (+40.2%)                     | +1935 (+16.6%)                   | +5993 (+51.4%)                            | -3244 (-27.8%)                   |
|                          | Brain, nervous system   | C70–C72 | 2735                          | 3.1               | 20   | 2742                          | 3.3               | 20   | +7 (+0.3%)                         | +220 (+8.0%)                     | +418 (+15.3%)                             | -631 (-23.1%)                    |
|                          | Multiple myeloma        | C88–C90 | 3578                          | 2.5               | 19   | 5395                          | 3.8               | 19   | +1817 (+50.8%)                     | +1556 (+43.5%)                   | +1307 (+36.5%)                            | -1046 (-29.2%)                   |
|                          | Leukemia                | C91–C95 | 5701                          | 5.9               | 16   | 6805                          | 7.6               | 15   | +1104 (+19.4%)                     | +1353 (+23.7%)                   | +1201 (+21.1%)                            | -1450 (-25.4%)                   |

<sup>a</sup>Estimated as annual average of 5-year periods

<sup>b</sup>Age-standardized rate

<sup>c</sup>Changes due to epidemiological factors (i.e., changes in population risks of being diagnosed with or died from cancers, improvements in diagnostic or treatment practices)

<sup>d</sup>Changes due to population age structure

<sup>e</sup>Changes due to population size

%: Proportion to the number of cases in 2015–2019.

**Table S4. Observed and projected top burden of cancer in Japan by genders and age groups.**

| Data      | Gender | Age Group                  | Burden Rank | Period 2015–2019 <sup>a</sup> |                |                | Period 2050–2054 <sup>a</sup> |                |                |
|-----------|--------|----------------------------|-------------|-------------------------------|----------------|----------------|-------------------------------|----------------|----------------|
|           |        |                            |             | Cancer Site                   | ICD-10         | Case/Death (%) | Cancer Site                   | ICD-10         | Case/Death (%) |
| Incidence | Male   | All age                    | 1           | Prostate                      | C61            | 89466 (16.7%)  | Prostate                      | C61            | 114306 (20.0%) |
|           |        |                            | 2           | Stomach                       | C16            | 88574 (16.6%)  | Colon/rectum                  | C18–C20        | 109737 (19.2%) |
|           |        |                            | 3           | Colon/rectum                  | C18–C20        | 86247 (16.1%)  | Lung, trachea                 | C33–C34        | 97615 (17.1%)  |
|           |        | Oldest-old (85+ years)     | 1           | Lung, trachea                 | C33–C34        | 11423 (17.9%)  | Prostate                      | C61            | 32077 (22.9%)  |
|           |        |                            | 2           | Stomach                       | C16            | 10583 (16.6%)  | Lung, trachea                 | C33–C34        | 23839 (17.0%)  |
|           |        |                            | 3           | Prostate                      | C61            | 9615 (15.1%)   | Colon/rectum                  | C18–C20        | 23202 (16.6%)  |
|           |        | Middle-old (75–84 years)   | 1           | Prostate                      | C61            | 32515 (18.6%)  | Prostate                      | C61            | 48743 (22.4%)  |
|           |        |                            | 2           | Stomach                       | C16            | 31013 (17.7%)  | Colon/rectum                  | C18–C20        | 38836 (17.8%)  |
|           |        |                            | 3           | Lung, trachea                 | C33–C34        | 28219 (16.1%)  | Lung, trachea                 | C33–C34        | 38697 (17.8%)  |
|           |        | Youngest-old (65–74 years) | 1           | Prostate                      | C61            | 36354 (19.2%)  | Colon/rectum                  | C18–C20        | 27801 (20.5%)  |
|           |        |                            | 2           | Stomach                       | C16            | 31628 (16.7%)  | Prostate                      | C61            | 27218 (20.0%)  |
|           |        |                            | 3           | Colon/rectum                  | C18–C20        | 30554 (16.2%)  | Lung, trachea                 | C33–C34        | 23817 (17.5%)  |
|           |        | Middle-adult (40–64 years) | 1           | Colon/rectum                  | C18–C20        | 20977 (20.9%)  | Colon/rectum                  | C18–C20        | 18886 (26.3%)  |
|           |        |                            | 2           | Stomach                       | C16            | 14956 (14.9%)  | Lung, trachea                 | C33–C34        | 11072 (15.4%)  |
|           |        |                            | 3           | Lung, trachea                 | C33–C34        | 12719 (12.7%)  | Prostate                      | C61            | 6261 ( 8.7%)   |
|           |        | Young-adult (20–39 years)  | 1           | Colon/rectum                  | C18–C20        | 899 (19.0%)    | Colon/rectum                  | C18–C20        | 970 (24.0%)    |
|           |        |                            | 2           | Malignant lymphoma            | C81–C85<br>C96 | 587 (12.4%)    | Malignant lymphoma            | C81–C85<br>C96 | 595 (14.7%)    |
|           |        |                            | 3           | Leukemia                      | C91–C95        | 574 (12.1%)    | Leukemia                      | C91–C95        | 515 (12.8%)    |
|           |        | Adolescent (15–19 years)   | 1           | Leukemia                      | C91–C95        | 107 (33.8%)    | Malignant lymphoma            | C81–C85<br>C96 | 119 (31.8%)    |
|           |        |                            | 2           | Malignant lymphoma            | C81–C85<br>C96 | 73 (23.0%)     | Leukemia                      | C91–C95        | 111 (29.7%)    |
|           |        |                            | 3           | Brain, nervous system         | C70–C72        | 59 (18.6%)     | Brain, nervous system         | C70–C72        | 60 (16.0%)     |
|           |        | Children (0–14 years)      | 1           | Leukemia                      | C91–C95        | 416 (48.2%)    | Leukemia                      | C91–C95        | 378 (38.4%)    |
|           |        |                            | 2           | Brain, nervous system         | C70–C72        | 178 (20.6%)    | Malignant lymphoma            | C81–C85<br>C96 | 321 (32.6%)    |
|           |        |                            | 3           | Malignant lymphoma            | C81–C85<br>C96 | 153 (17.7%)    | Brain, nervous system         | C70–C72        | 213 (21.6%)    |
|           | Female | All age                    | 1           | Female breast                 | C50            | 92901 (23.1%)  | Female breast                 | C50            | 132332 (25.1%) |
|           |        |                            | 2           | Colon/rectum                  | C18–C20        | 65657 (16.3%)  | Colon/rectum                  | C18–C20        | 97698 (18.6%)  |
|           |        |                            | 3           | Lung, trachea                 | C33–C34        | 40814 (10.1%)  | Lung, trachea                 | C33–C34        | 48533 ( 9.2%)  |
|           |        | Oldest-old (85+ years)     | 1           | Colon/rectum                  | C18–C20        | 13828 (20.5%)  | Colon/rectum                  | C18–C20        | 31970 (22.2%)  |
|           |        |                            | 2           | Stomach                       | C16            | 9101 (13.5%)   | Female breast                 | C50            | 25094 (17.4%)  |
|           |        |                            | 3           | Lung, trachea                 | C33–C34        | 7877 (11.7%)   | Lung, trachea                 | C33–C34        | 17908 (12.4%)  |
|           |        | Middle-old (75–84 years)   | 1           | Colon/rectum                  | C18–C20        | 19806 (19.3%)  | Female breast                 | C50            | 31754 (21.4%)  |
|           |        |                            | 2           | Female breast                 | C50            | 14506 (14.2%)  | Colon/rectum                  | C18–C20        | 30471 (20.5%)  |
|           |        |                            | 3           | Stomach                       | C16            | 13586 (13.3%)  | Lung, trachea                 | C33–C34        | 17104 (11.5%)  |
|           |        | Youngest-old (65–74 years) | 1           | Female breast                 | C50            | 22702 (22.4%)  | Female breast                 | C50            | 24986 (24.7%)  |
|           |        |                            | 2           | Colon/rectum                  | C18–C20        | 17706 (17.5%)  | Colon/rectum                  | C18–C20        | 19892 (19.6%)  |
|           |        |                            | 3           | Lung, trachea                 | C33–C34        | 12765 (12.6%)  | Lung, trachea                 | C33–C34        | 9031 ( 8.9%)   |
|           |        | Middle-adult (40–64 years) | 1           | Female breast                 | C50            | 45392 (38.9%)  | Female breast                 | C50            | 45448 (38.0%)  |
|           |        |                            | 2           | Colon/rectum                  | C18–C20        | 13549 (11.6%)  | Corpus uteri                  | C54            | 18232 (15.2%)  |
|           |        |                            | 3           | Corpus uteri                  | C54            | 9398 ( 8.1%)   | Colon/rectum                  | C18–C20        | 14781 (12.4%)  |

| Data      | Gender | Age Group                  | Burden Rank | Period 2015–2019 <sup>a</sup> |                |                | Period 2050–2054 <sup>a</sup> |                |                |
|-----------|--------|----------------------------|-------------|-------------------------------|----------------|----------------|-------------------------------|----------------|----------------|
|           |        |                            |             | Cancer Site                   | ICD-10         | Case/Death (%) | Cancer Site                   | ICD-10         | Case/Death (%) |
|           |        | Young-adult (20–39 years)  | 1           | Female breast                 | C50            | 3967 (30.0%)   | Female breast                 | C50            | 5047 (42.5%)   |
|           |        |                            | 2           | Cervix uteri                  | C53            | 1915 (14.5%)   | Thyroid                       | C73            | 1200 (10.1%)   |
|           |        |                            | 3           | Thyroid                       | C73            | 1899 (14.4%)   | Ovary                         | C56            | 1050 ( 8.8%)   |
|           |        | Adolescent (15–19 years)   | 1           | Ovary                         | C56            | 94 (23.3%)     | Malignant lymphoma            | C81–C85<br>C96 | 83 (22.7%)     |
|           |        |                            | 2           | Thyroid                       | C73            | 90 (22.3%)     | Ovary                         | C56            | 76 (20.8%)     |
|           |        |                            | 3           | Leukemia                      | C91–C95        | 73 (18.1%)     | Leukemia                      | C91–C95        | 68 (18.6%)     |
|           |        | Children (0–14 years)      | 1           | Leukemia                      | C91–C95        | 328 (45.1%)    | Leukemia                      | C91–C95        | 303 (42.2%)    |
|           |        |                            | 2           | Brain, nervous system         | C70–C72        | 148 (20.4%)    | Malignant lymphoma            | C81–C85<br>C96 | 171 (23.8%)    |
|           |        |                            | 3           | Malignant lymphoma            | C81–C85<br>C96 | 84 (11.6%)     | Brain, nervous system         | C70–C72        | 121 (16.9%)    |
| Mortality | Male   | All age                    | 1           | Lung, trachea                 | C33–C34        | 52872 (25.1%)  | Lung, trachea                 | C33–C34        | 42325 (24.1%)  |
|           |        |                            | 2           | Stomach                       | C16            | 29457 (14.0%)  | Colon/rectum                  | C18–C20        | 26083 (14.8%)  |
|           |        |                            | 3           | Colon/rectum                  | C18–C20        | 27135 (12.9%)  | Stomach                       | C16            | 19634 (11.2%)  |
|           |        | Oldest-old (85+ years)     | 1           | Lung, trachea                 | C33–C34        | 11556 (24.7%)  | Lung, trachea                 | C33–C34        | 14464 (23.2%)  |
|           |        |                            | 2           | Stomach                       | C16            | 6653 (14.2%)   | Colon/rectum                  | C18–C20        | 8937 (14.3%)   |
|           |        |                            | 3           | Colon/rectum                  | C18–C20        | 5510 (11.8%)   | Prostate                      | C61            | 8249 (13.2%)   |
|           |        | Middle-old (75–84 years)   | 1           | Lung, trachea                 | C33–C34        | 19734 (25.7%)  | Lung, trachea                 | C33–C34        | 18063 (26.6%)  |
|           |        |                            | 2           | Stomach                       | C16            | 10887 (14.2%)  | Colon/rectum                  | C18–C20        | 9428 (13.9%)   |
|           |        |                            | 3           | Colon/rectum                  | C18–C20        | 9046 (11.8%)   | Stomach                       | C16            | 7197 (10.6%)   |
|           |        | Youngest-old (65–74 years) | 1           | Lung, trachea                 | C33–C34        | 15876 (26.5%)  | Lung, trachea                 | C33–C34        | 7348 (24.0%)   |
|           |        |                            | 2           | Stomach                       | C16            | 8347 (13.9%)   | Colon/rectum                  | C18–C20        | 4866 (15.9%)   |
|           |        |                            | 3           | Colon/rectum                  | C18–C20        | 8067 (13.4%)   | Stomach                       | C16            | 3847 (12.6%)   |
|           |        | Middle-adult (40–64 years) | 1           | Lung, trachea                 | C33–C34        | 5634 (21.6%)   | Colon/rectum                  | C18–C20        | 2768 (19.1%)   |
|           |        |                            | 2           | Colon/rectum                  | C18–C20        | 4366 (16.7%)   | Lung, trachea                 | C33–C34        | 2420 (16.7%)   |
|           |        |                            | 3           | Stomach                       | C16            | 3458 (13.2%)   | Stomach                       | C16            | 2181 (15.1%)   |
|           |        | Young-adult (20–39 years)  | 1           | Colon/rectum                  | C18–C20        | 145 (18.4%)    | Colon/rectum                  | C18–C20        | 83 (23.1%)     |
|           |        |                            | 2           | Leukemia                      | C91–C95        | 124 (15.8%)    | Brain, nervous system         | C70–C72        | 77 (21.4%)     |
|           |        |                            | 3           | Stomach                       | C16            | 112 (14.2%)    | Leukemia                      | C91–C95        | 34 ( 9.4%)     |
|           |        | Adolescent (15–19 years)   | 1           | Leukemia                      | C91–C95        | 20 (44.4%)     | Brain, nervous system         | C70–C72        | 15 (42.9%)     |
|           |        |                            | 2           | Brain, nervous system         | C70–C72        | 14 (31.1%)     | Leukemia                      | C91–C95        | 10 (28.6%)     |
|           |        |                            | 3           | Malignant lymphoma            | C81–C85<br>C96 | 4 ( 8.9%)      | Malignant lymphoma            | C81–C85<br>C96 | 5 (14.3%)      |
|           |        | Children (0–14 years)      | 1           | Brain, nervous system         | C70–C72        | 48 (44.9%)     | Brain, nervous system         | C70–C72        | 46 (54.8%)     |
|           |        |                            | 2           | Leukemia                      | C91–C95        | 42 (39.3%)     | Leukemia                      | C91–C95        | 26 (31.0%)     |
|           |        |                            | 3           | Malignant lymphoma            | C81–C85<br>C96 | 6 ( 5.6%)      | Malignant lymphoma            | C81–C85<br>C96 | 5 ( 6.0%)      |
|           | Female | All age                    | 1           | Colon/rectum                  | C18–C20        | 23373 (16.2%)  | Colon/rectum                  | C18–C20        | 24654 (18.7%)  |
|           |        |                            | 2           | Lung, trachea                 | C33–C34        | 21535 (14.9%)  | Lung, trachea                 | C33–C34        | 19655 (14.9%)  |
|           |        |                            | 3           | Pancreas                      | C25            | 16920 (11.7%)  | Pancreas                      | C25            | 19545 (14.8%)  |
|           |        | Oldest-old (85+ years)     | 1           | Colon/rectum                  | C18–C20        | 9382 (18.8%)   | Colon/rectum                  | C18–C20        | 13137 (21.0%)  |
|           |        |                            | 2           | Lung, trachea                 | C33–C34        | 7609 (15.3%)   | Lung, trachea                 | C33–C34        | 9852 (15.7%)   |
|           |        |                            | 3           | Stomach                       | C16            | 6341 (12.7%)   | Pancreas                      | C25            | 9001 (14.4%)   |
|           |        | Middle-old (75–84 years)   | 1           | Lung, trachea                 | C33–C34        | 7255 (16.4%)   | Colon/rectum                  | C18–C20        | 7068 (17.4%)   |
|           |        |                            | 2           | Colon/rectum                  | C18–C20        | 6751 (15.2%)   | Pancreas                      | C25            | 6783 (16.7%)   |

| Data | Gender | Age Group                  | Burden Rank | Period 2015–2019 <sup>a</sup> |         |                | Period 2050–2054 <sup>a</sup> |         |                |
|------|--------|----------------------------|-------------|-------------------------------|---------|----------------|-------------------------------|---------|----------------|
|      |        |                            |             | Cancer Site                   | ICD-10  | Case/Death (%) | Cancer Site                   | ICD-10  | Case/Death (%) |
|      |        | Youngest-old (65–74 years) | 3           | Pancreas                      | C25     | 5990 (13.5%)   | Lung, trachea                 | C33–C34 | 6612 (16.3%)   |
|      |        |                            | 1           | Lung, trachea                 | C33–C34 | 4700 (16.2%)   | Colon/rectum                  | C18–C20 | 2793 (16.8%)   |
|      |        |                            | 2           | Colon/rectum                  | C18–C20 | 4344 (14.9%)   | Pancreas                      | C25     | 2591 (15.6%)   |
|      |        |                            | 3           | Pancreas                      | C25     | 3880 (13.3%)   | Lung, trachea                 | C33–C34 | 2235 (13.5%)   |
|      |        | Middle-adult (40–64 years) | 1           | Female breast                 | C50     | 5011 (25.1%)   | Female breast                 | C50     | 2813 (24.7%)   |
|      |        |                            | 2           | Colon/rectum                  | C18–C20 | 2781 (13.9%)   | Colon/rectum                  | C18–C20 | 1598 (14.0%)   |
|      |        |                            | 3           | Lung, trachea                 | C33–C34 | 1924 ( 9.6%)   | Pancreas                      | C25     | 1132 ( 9.9%)   |
|      |        | Young-adult (20–39 years)  | 1           | Female breast                 | C50     | 268 (23.8%)    | Female breast                 | C50     | 225 (32.4%)    |
|      |        |                            | 2           | Cervix uteri                  | C53     | 163 (14.5%)    | Cervix uteri                  | C53     | 97 (14.0%)     |
|      |        |                            | 3           | Stomach                       | C16     | 123 (10.9%)    | Brain, nervous system         | C70–C72 | 72 (10.4%)     |
|      |        | Adolescent (15–19 years)   | 1           | Leukemia                      | C91–C95 | 14 (43.8%)     | Brain, nervous system         | C70–C72 | 13 (50.0%)     |
|      |        |                            | 2           | Brain, nervous system         | C70–C72 | 7 (21.9%)      | Leukemia                      | C91–C95 | 7 (26.9%)      |
|      |        |                            | 3           | Ovary                         | C56     | 2 ( 6.2%)      | Stomach                       | C16     | 1 ( 3.8%)      |
|      |        | Children (0–14 years)      | 1           | Brain, nervous system         | C70–C72 | 40 (45.5%)     | Brain, nervous system         | C70–C72 | 52 (62.7%)     |
|      |        |                            | 2           | Leukemia                      | C91–C95 | 36 (40.9%)     | Leukemia                      | C91–C95 | 22 (26.5%)     |
|      |        |                            | 3           | Liver                         | C22     | 5 ( 5.7%)      | Liver                         | C22     | 3 ( 3.6%)      |

<sup>a</sup>Estimated as annual average of 5-year periods

%: Proportion to the number of all-site combined cases/deaths.



**Table S5. Cancer mortality by genders and decomposed changes in deaths over 2020–2054 for other cancers.**

| Gender                   | Cancer Site             | ICD-10  | Period 2015–2019 <sup>a</sup> |                   |      | Period 2050–2054 <sup>a</sup> |                   |      | Death changes over period 2020–2054 |                                  |                                           |                                  |
|--------------------------|-------------------------|---------|-------------------------------|-------------------|------|-------------------------------|-------------------|------|-------------------------------------|----------------------------------|-------------------------------------------|----------------------------------|
|                          |                         |         | Death                         | Rate <sup>b</sup> | Rank | Death                         | Rate <sup>b</sup> | Rank | Total (%)                           | Population risk (%) <sup>c</sup> | Population age structure (%) <sup>d</sup> | Population size (%) <sup>e</sup> |
| Male and female combined | Oral cavity and pharynx | C00–C14 | 7569                          | 2.6               | 14   | 6539                          | 1.8               | 14   | -1030 (-13.6%)                      | -2305 (-30.5%)                   | +3021 (+39.9%)                            | -1746 (-23.1%)                   |
|                          | Larynx                  | C32     | 899                           | 0.3               | 22   | 745                           | 0.2               | 22   | -154 (-17.1%)                       | -380 (-42.3%)                    | +436 (+48.5%)                             | -210 (-23.4%)                    |
|                          | Skin                    | C43–C44 | 1593                          | 0.5               | 21   | 1795                          | 0.4               | 20   | +202 (+12.7%)                       | -311 (-19.5%)                    | +931 (+58.4%)                             | -418 (-26.2%)                    |
|                          | Brain, nervous system   | C70–C72 | 2653                          | 1.3               | 18   | 3620                          | 2.0               | 17   | +967 (+36.4%)                       | +1091 (+41.1%)                   | +648 (+24.4%)                             | -772 (-29.1%)                    |
|                          | Multiple myeloma        | C88–C90 | 4276                          | 1.2               | 16   | 3124                          | 0.8               | 19   | -1152 (-26.9%)                      | -2065 (-48.3%)                   | +1837 (+43.0%)                            | -924 (-21.6%)                    |
|                          | Leukemia                | C91–C95 | 8714                          | 3.1               | 12   | 6902                          | 1.9               | 13   | -1812 (-20.8%)                      | -3176 (-36.4%)                   | +3282 (+37.7%)                            | -1918 (-22.0%)                   |
| Male                     | Oral cavity and pharynx | C00–C14 | 5376                          | 3.7               | 12   | 4131                          | 2.3               | 13   | -1245 (-23.2%)                      | -1971 (-36.7%)                   | +1923 (+35.8%)                            | -1198 (-22.3%)                   |
|                          | Larynx                  | C32     | 827                           | 0.5               | 16   | 656                           | 0.3               | 17   | -171 (-20.7%)                       | -380 (-45.9%)                    | +399 (+48.2%)                             | -191 (-23.1%)                    |
|                          | Skin                    | C43–C44 | 791                           | 0.5               | 17   | 903                           | 0.4               | 16   | +112 (+14.2%)                       | -143 (-18.1%)                    | +472 (+59.7%)                             | -217 (-27.4%)                    |
|                          | Brain, nervous system   | C70–C72 | 1502                          | 1.5               | 15   | 1938                          | 2.0               | 14   | +436 (+29.0%)                       | +487 (+32.4%)                    | +385 (+25.6%)                             | -435 (-29.0%)                    |
|                          | Multiple myeloma        | C88–C90 | 2167                          | 1.2               | 14   | 1778                          | 0.8               | 15   | -389 (-18.0%)                       | -933 (-43.1%)                    | +1053 (+48.6%)                            | -509 (-23.5%)                    |
|                          | Leukemia                | C91–C95 | 5270                          | 3.7               | 13   | 4342                          | 2.3               | 12   | -928 (-17.6%)                       | -1839 (-34.9%)                   | +2124 (+40.3%)                            | -1212 (-23.0%)                   |
| Female                   | Oral cavity and pharynx | C00–C14 | 2193                          | 1.3               | 15   | 2408                          | 1.1               | 16   | +215 (+9.8%)                        | -334 (-15.2%)                    | +1098 (+50.1%)                            | -549 (-25.0%)                    |
|                          | Larynx                  | C32     | 72                            | 0.0               | 21   | 89                            | 0.0               | 21   | +17 (+23.6%)                        | -0 (-0.0%)                       | +36 (+50.0%)                              | -19 (-26.4%)                     |
|                          | Skin                    | C43–C44 | 802                           | 0.4               | 20   | 891                           | 0.3               | 20   | +89 (+11.1%)                        | -168 (-20.9%)                    | +459 (+57.2%)                             | -201 (-25.1%)                    |
|                          | Brain, nervous system   | C70–C72 | 1151                          | 1.1               | 19   | 1681                          | 1.9               | 17   | +530 (+46.0%)                       | +604 (+52.5%)                    | +263 (+22.8%)                             | -336 (-29.2%)                    |
|                          | Multiple myeloma        | C88–C90 | 2110                          | 1.2               | 16   | 1346                          | 0.7               | 18   | -764 (-36.2%)                       | -1132 (-53.6%)                   | +784 (+37.2%)                             | -416 (-19.7%)                    |
|                          | Leukemia                | C91–C95 | 3444                          | 2.5               | 10   | 2560                          | 1.4               | 15   | -884 (-25.7%)                       | -1337 (-38.8%)                   | +1158 (+33.6%)                            | -705 (-20.5%)                    |

<sup>a</sup>Estimated as annual average of 5-year periods

<sup>b</sup>Age-standardized rate

<sup>c</sup>Changes due to epidemiological factors (i.e., changes in population risks of being diagnosed with or died from cancers, improvements in diagnostic or treatment practices)

<sup>d</sup>Changes due to population age structure

<sup>e</sup>Changes due to population size

%: Proportion to the number of deaths in 2015–2019.

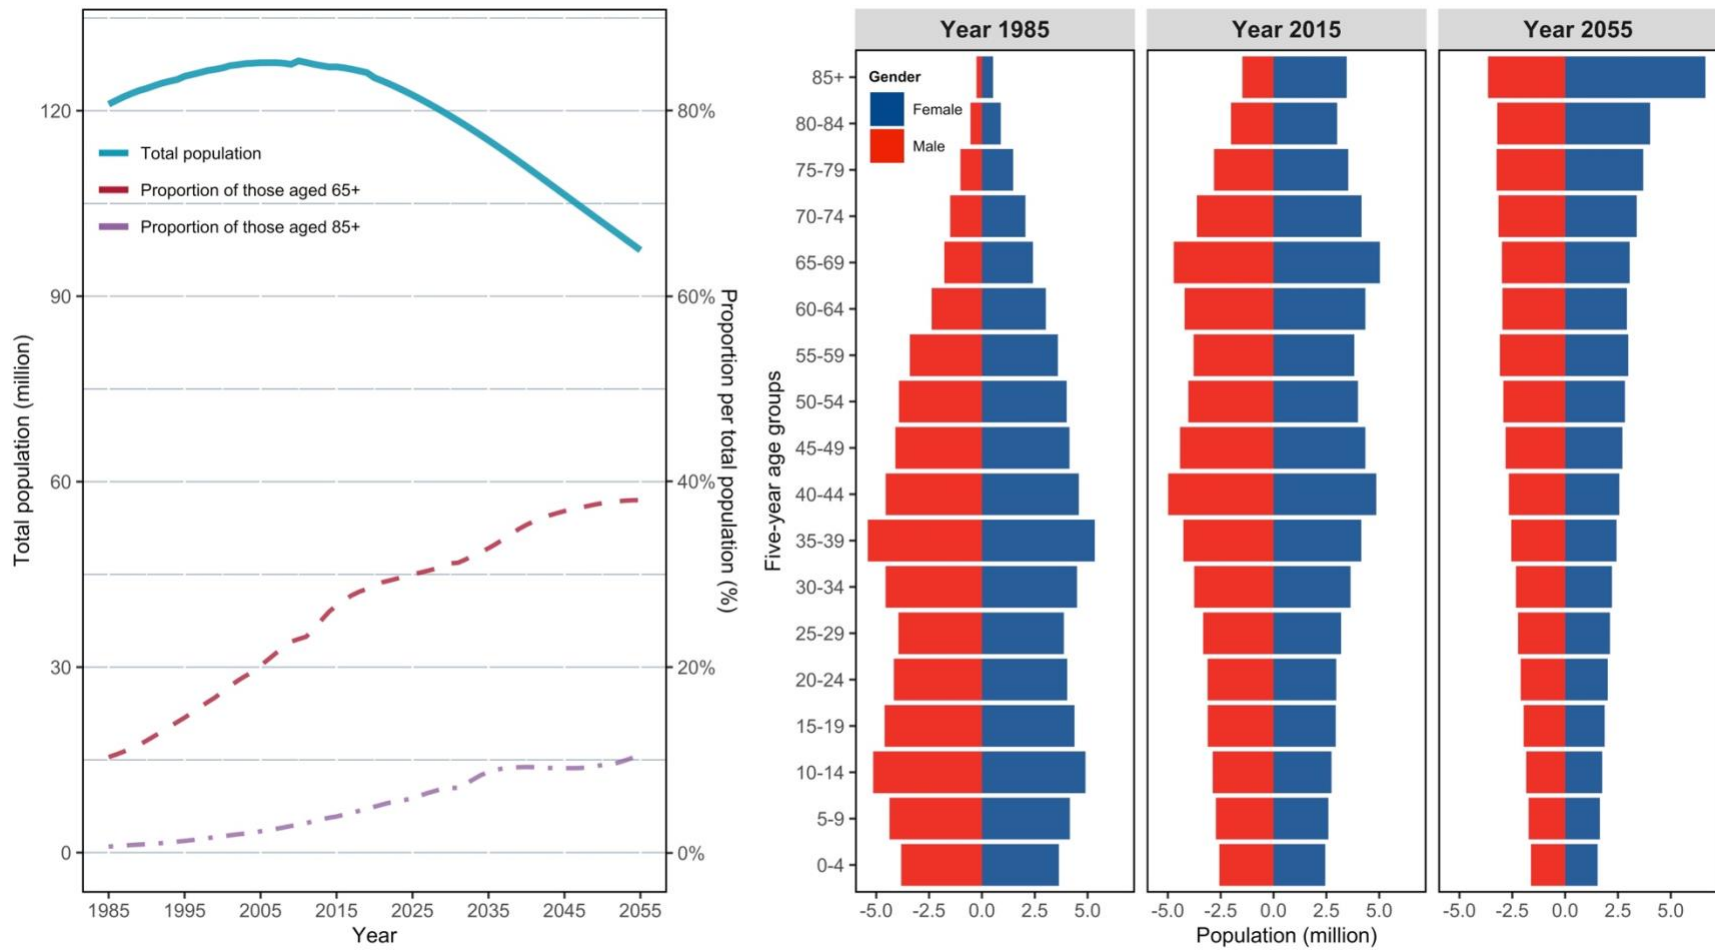

Figure S1. Trend in and projection of total population, proportions of people aged 65+ and 85+, and population pyramids in Japan, 1985–2055.

# Cancer site: Stomach

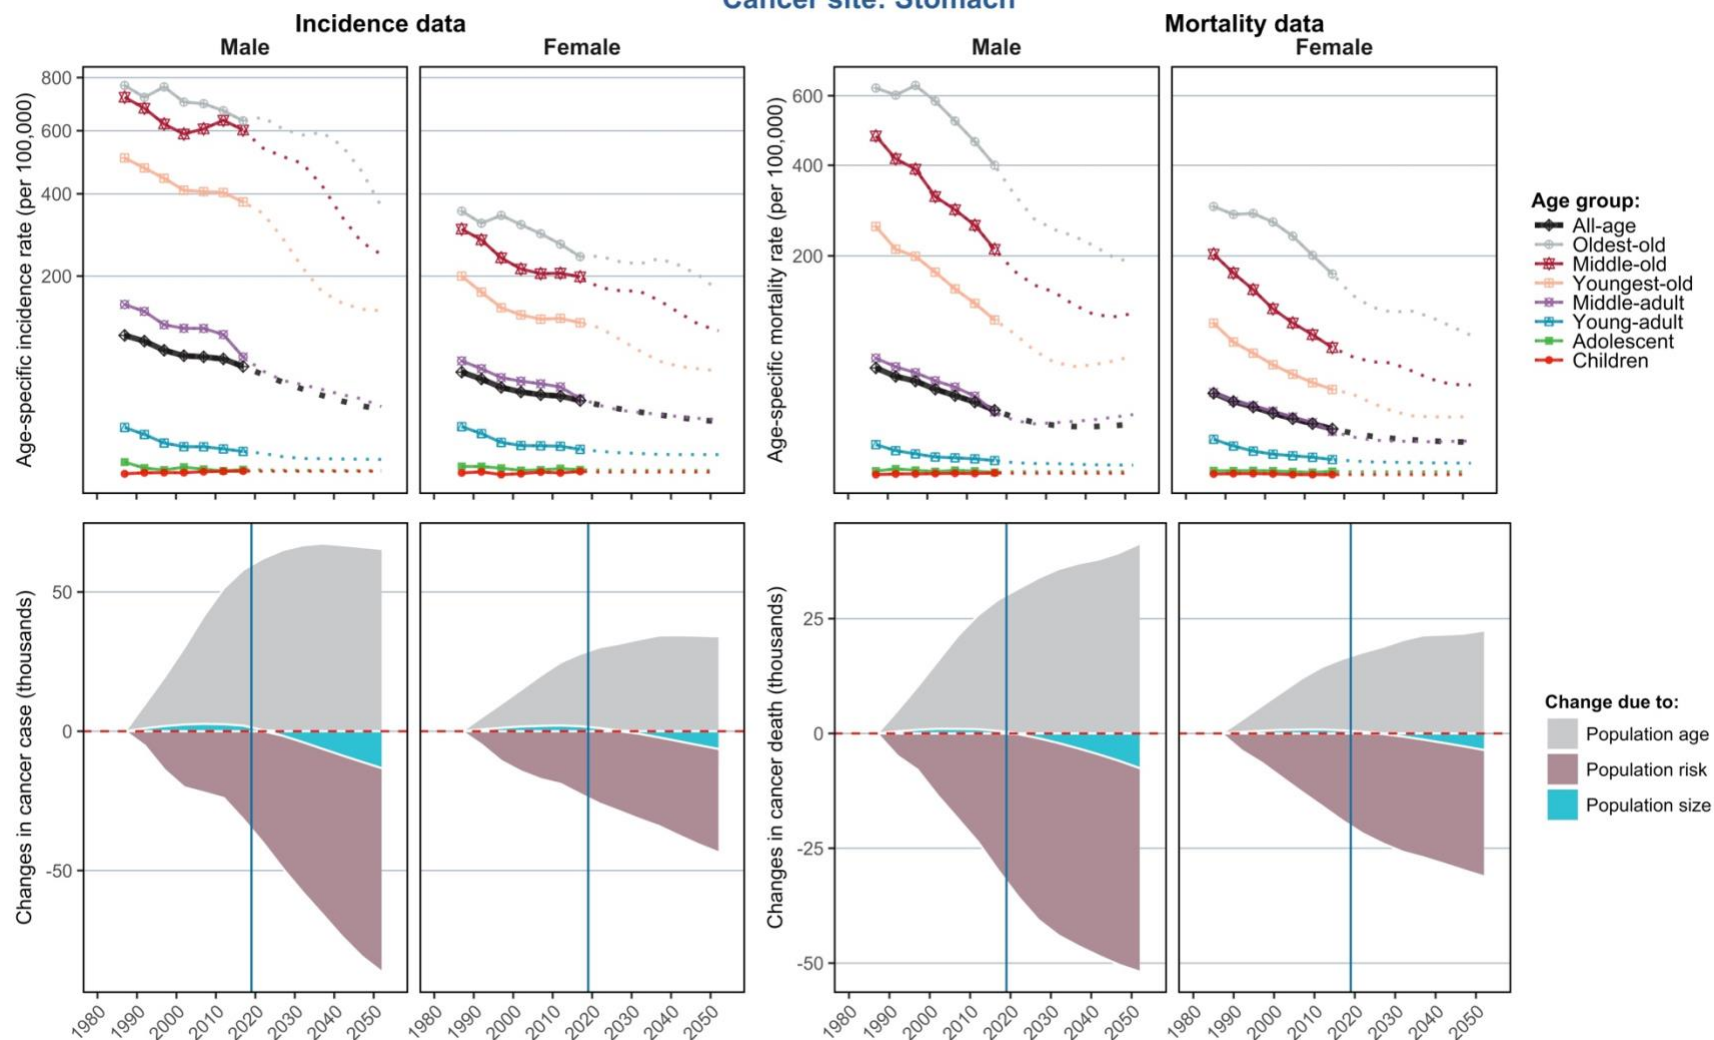

Figure S2. Projections of age-specific incidence and mortality rates and decomposed changes in new cases and deaths — Stomach.

### Cancer site: Colon/rectum

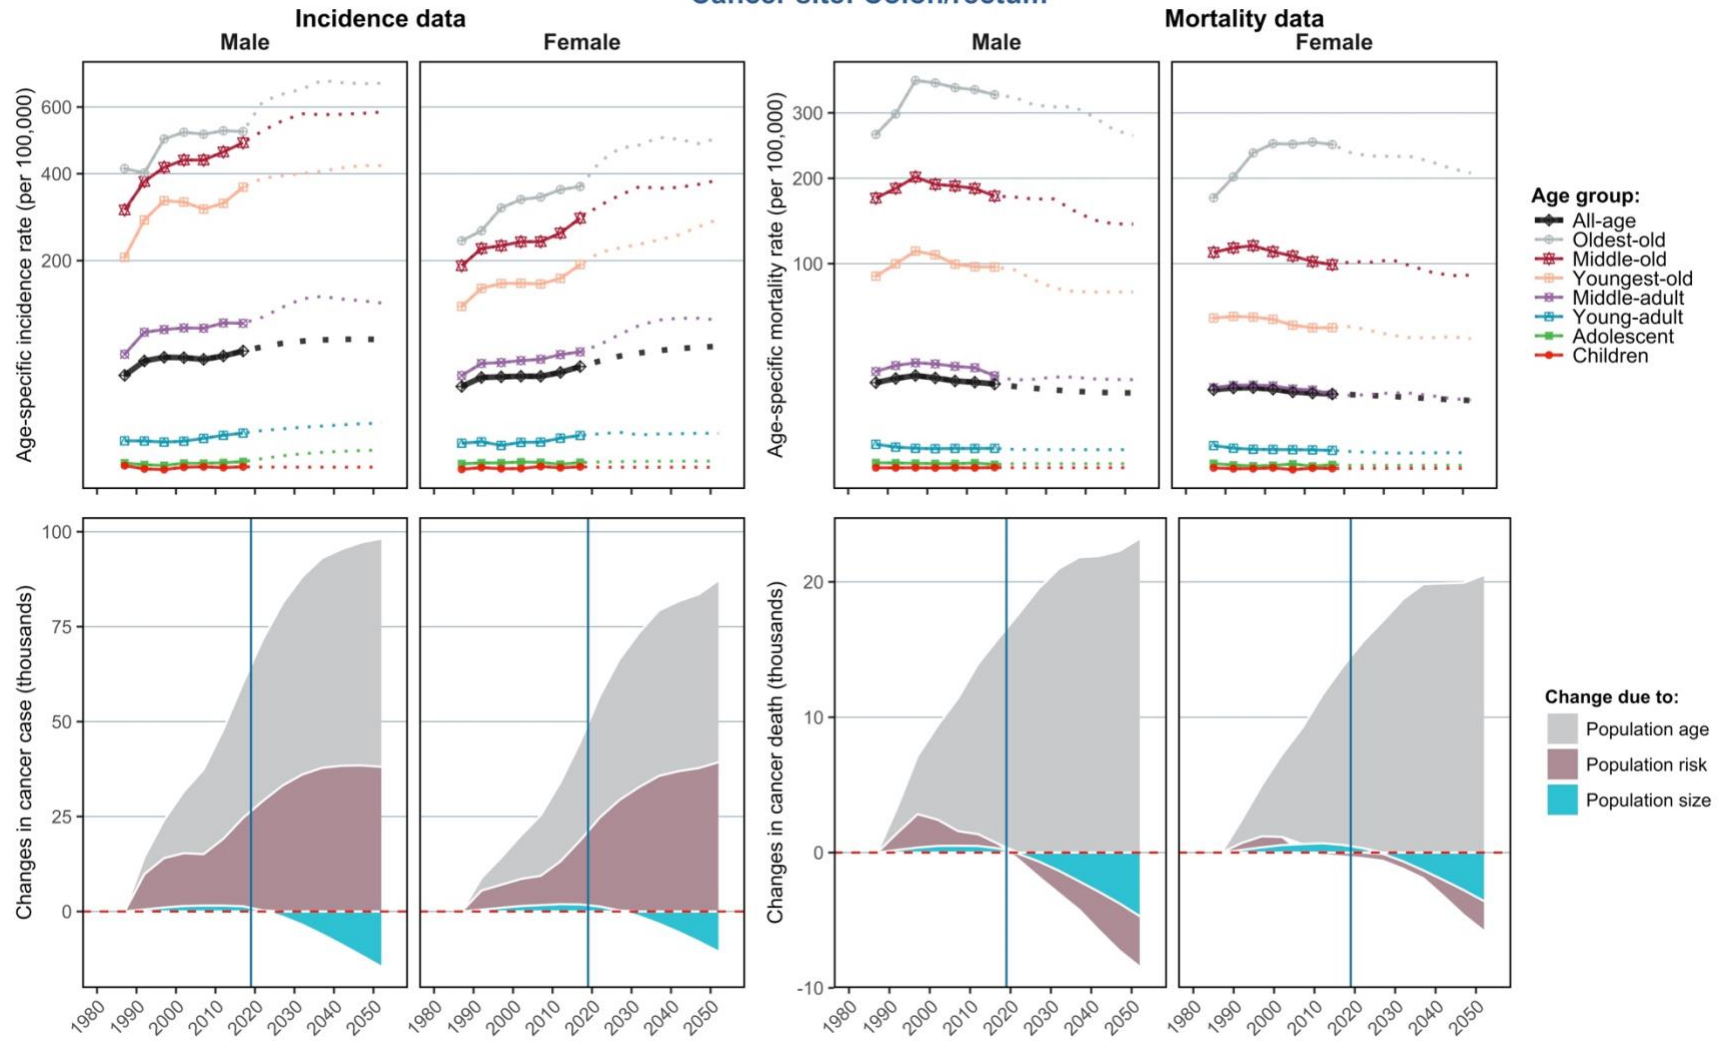

Figure S3. Projections of age-specific incidence and mortality rates and decomposed changes in new cases and deaths — Colon/rectum.

# Cancer site: Liver

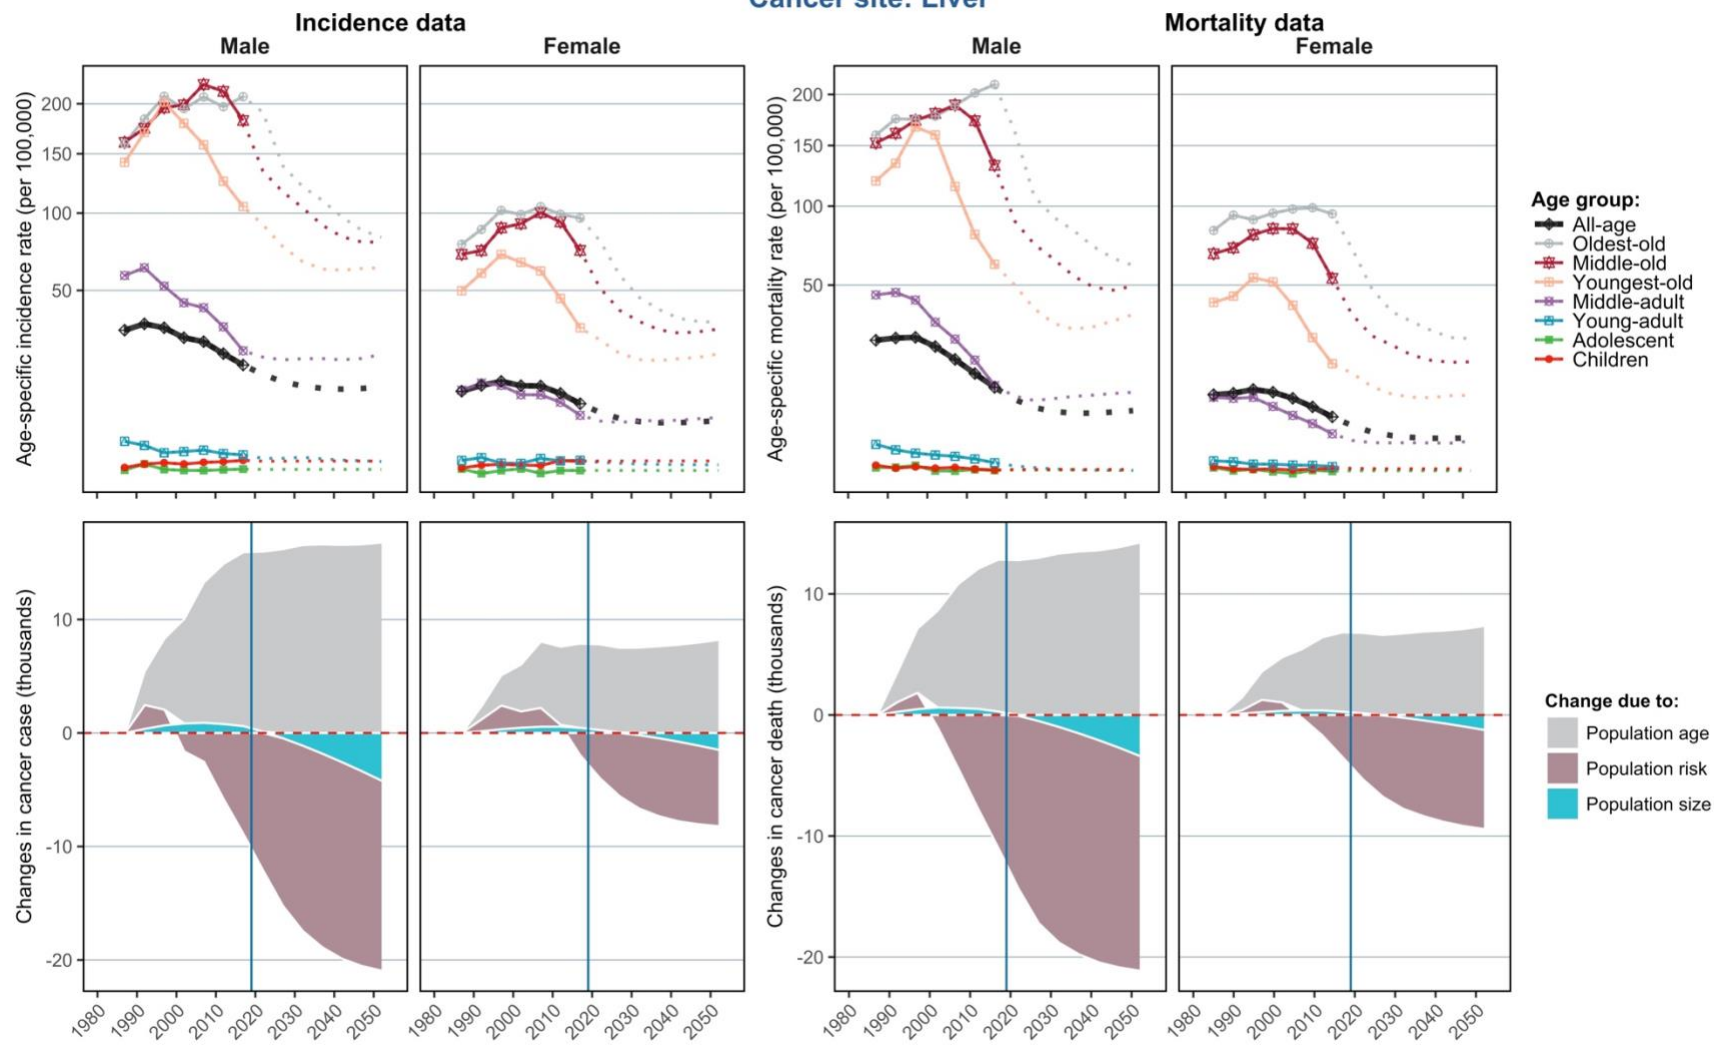

Figure S4. Projections of age-specific incidence and mortality rates and decomposed changes in new cases and deaths — Liver.

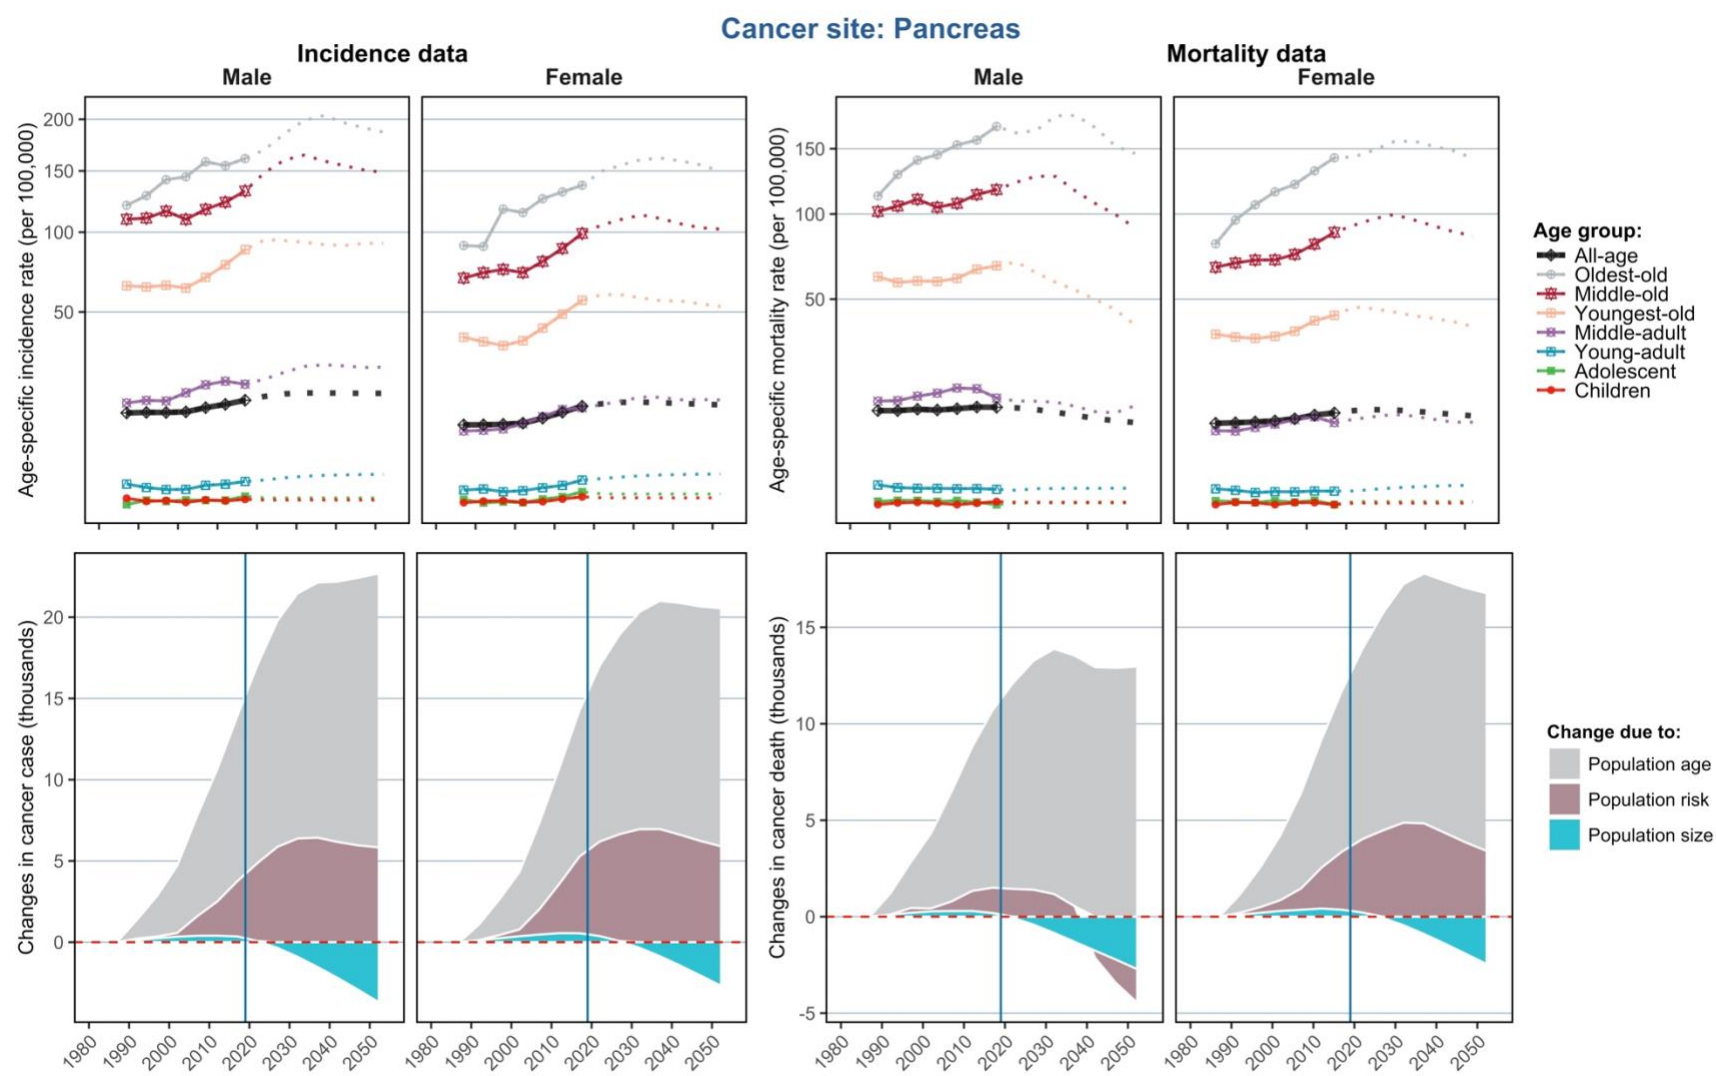



### Cancer site: Lung, trachea

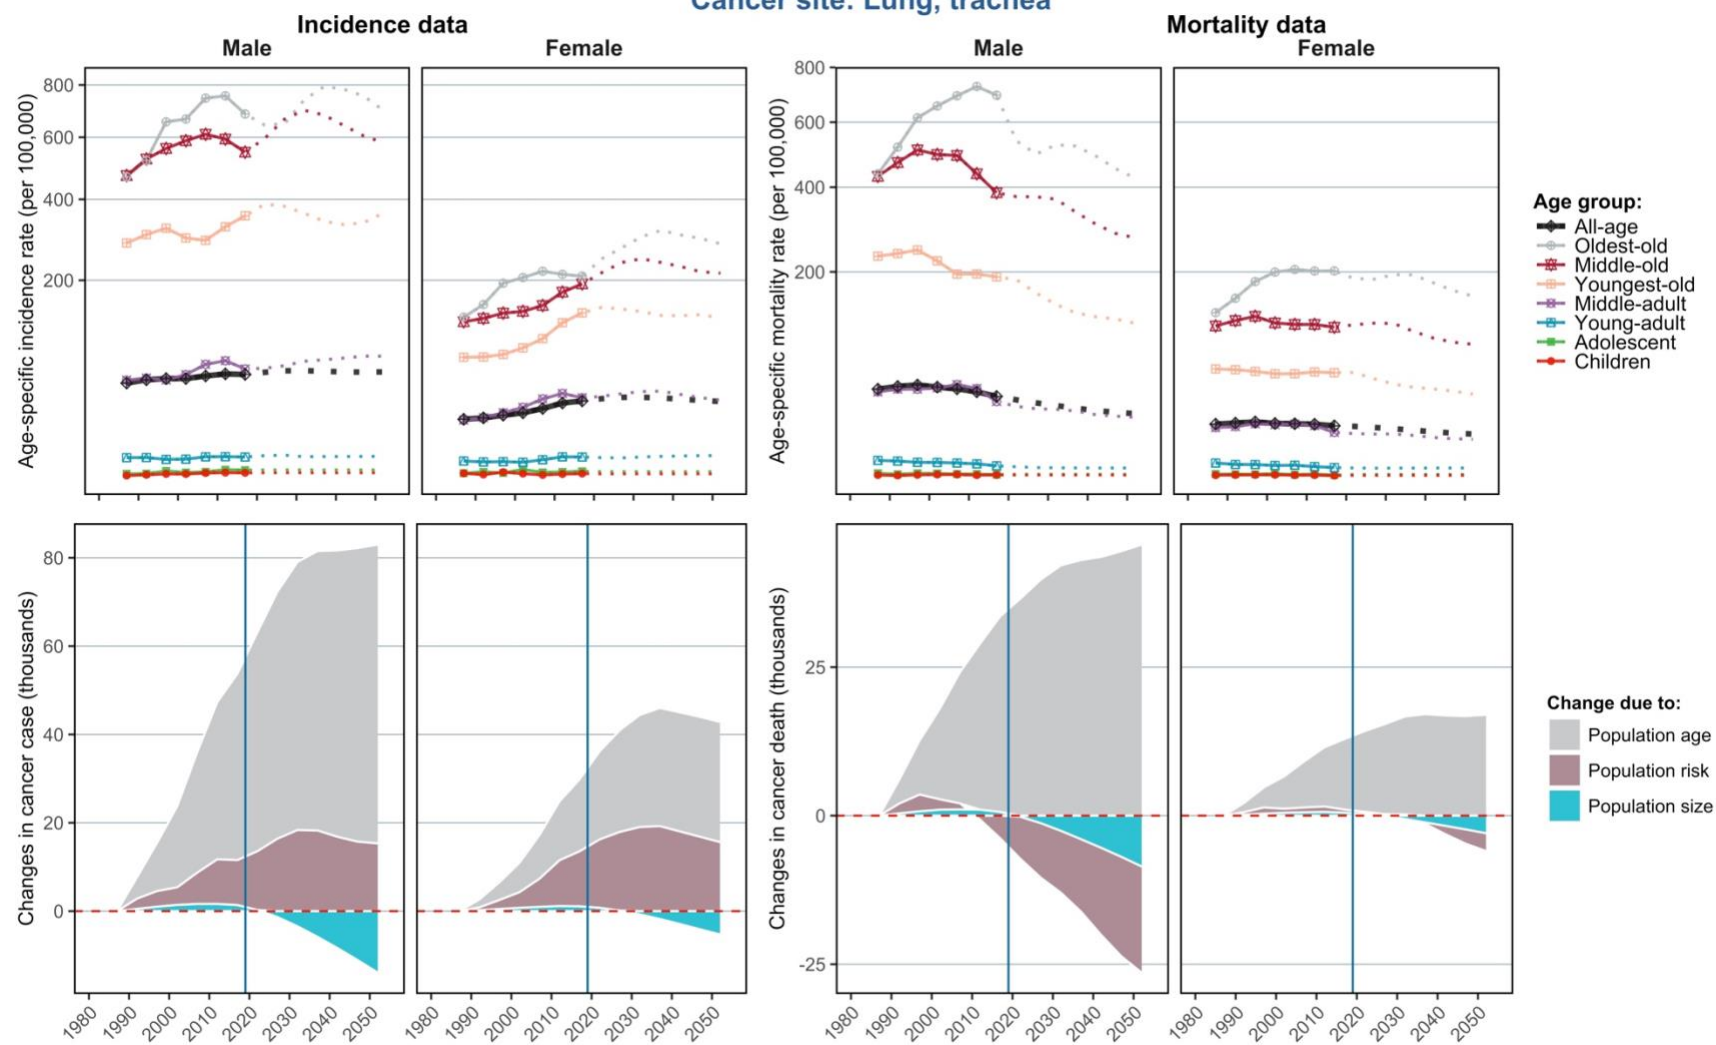

Figure S6. Projections of age-specific incidence and mortality rates and decomposed changes in new cases and deaths — Lung, trachea.

### Cancer site: Prostate

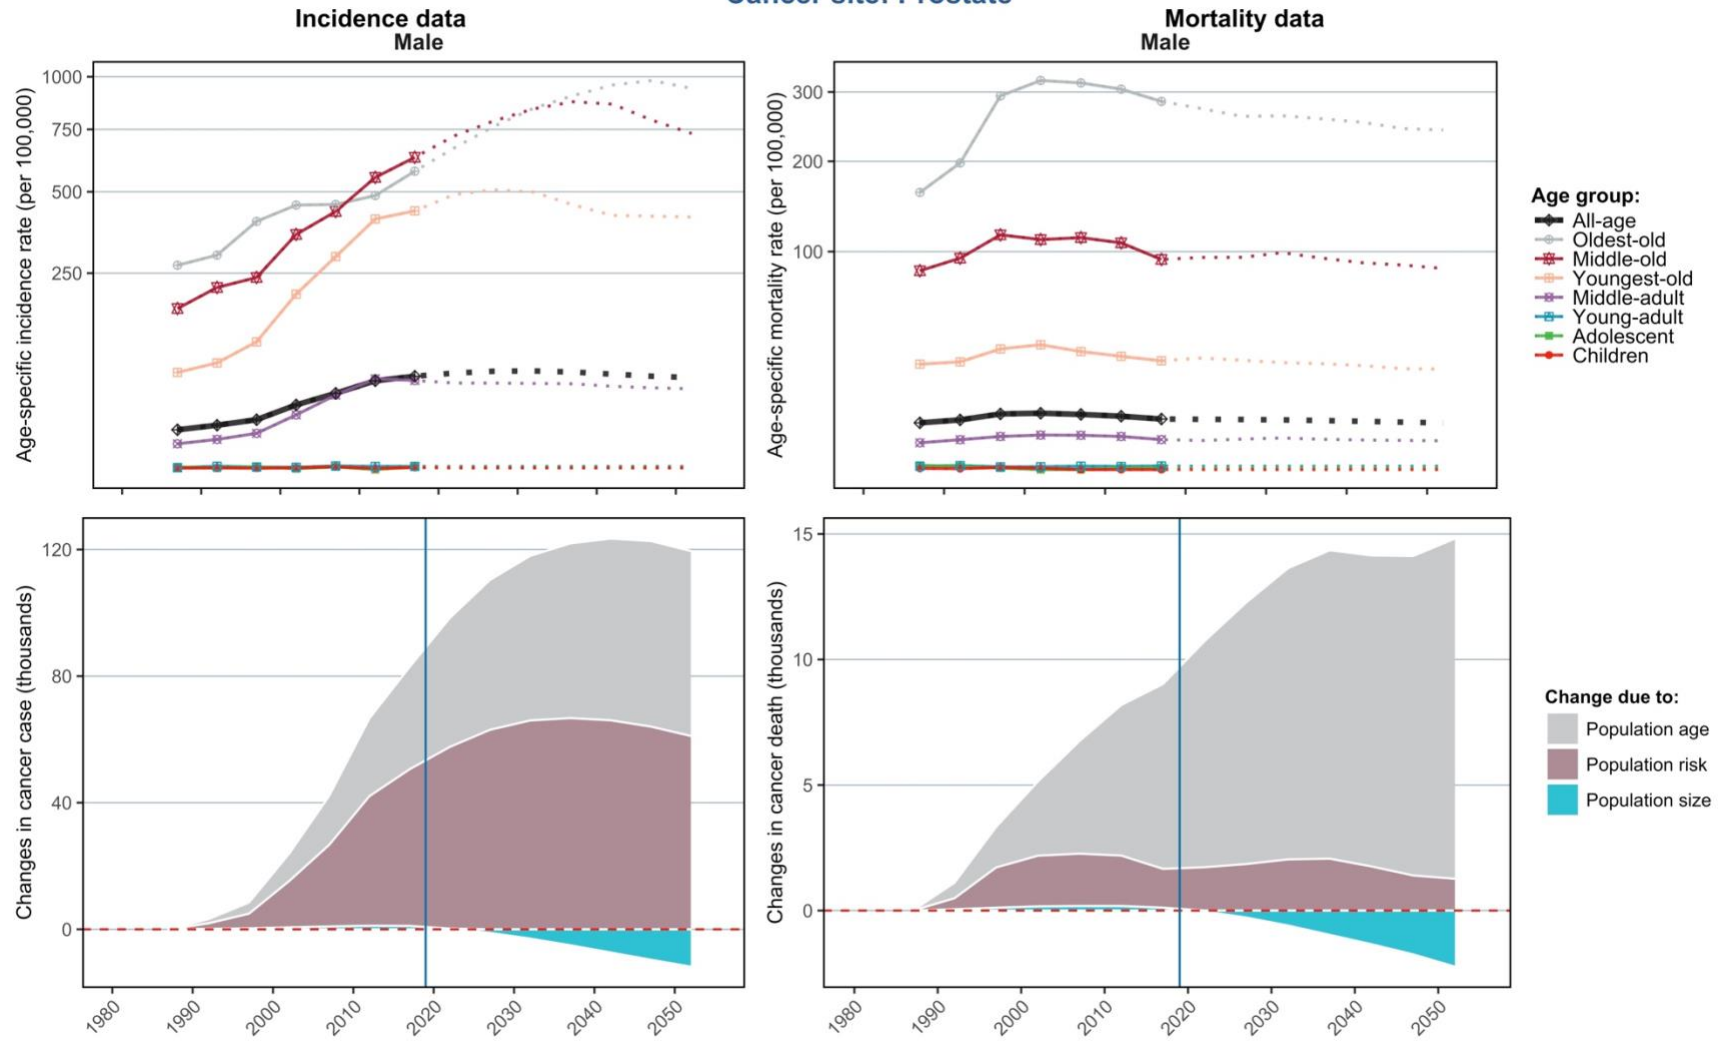

Figure S7. Projections of age-specific incidence and mortality rates and decomposed changes in new cases and deaths — Prostate.



### Cancer site: Female breast

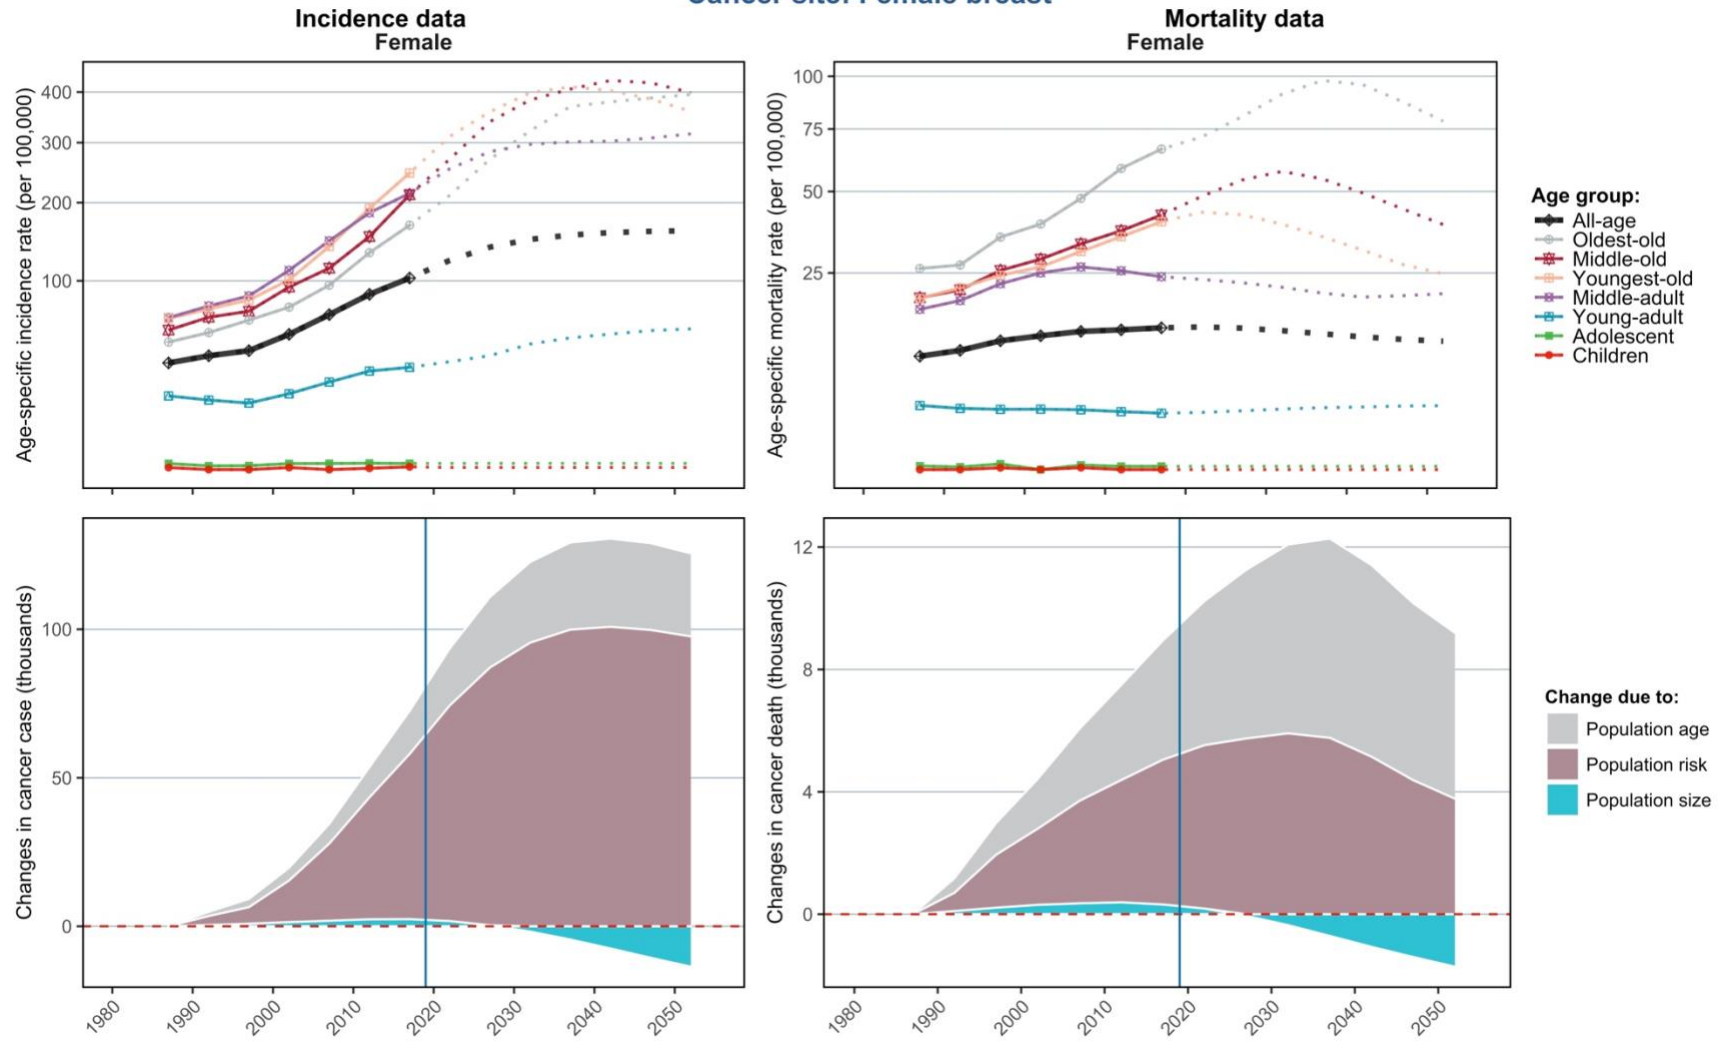

Figure S8. Projections of age-specific incidence and mortality rates and decomposed changes in new cases and deaths — Female breast.

### Cancer site: Cervix uteri

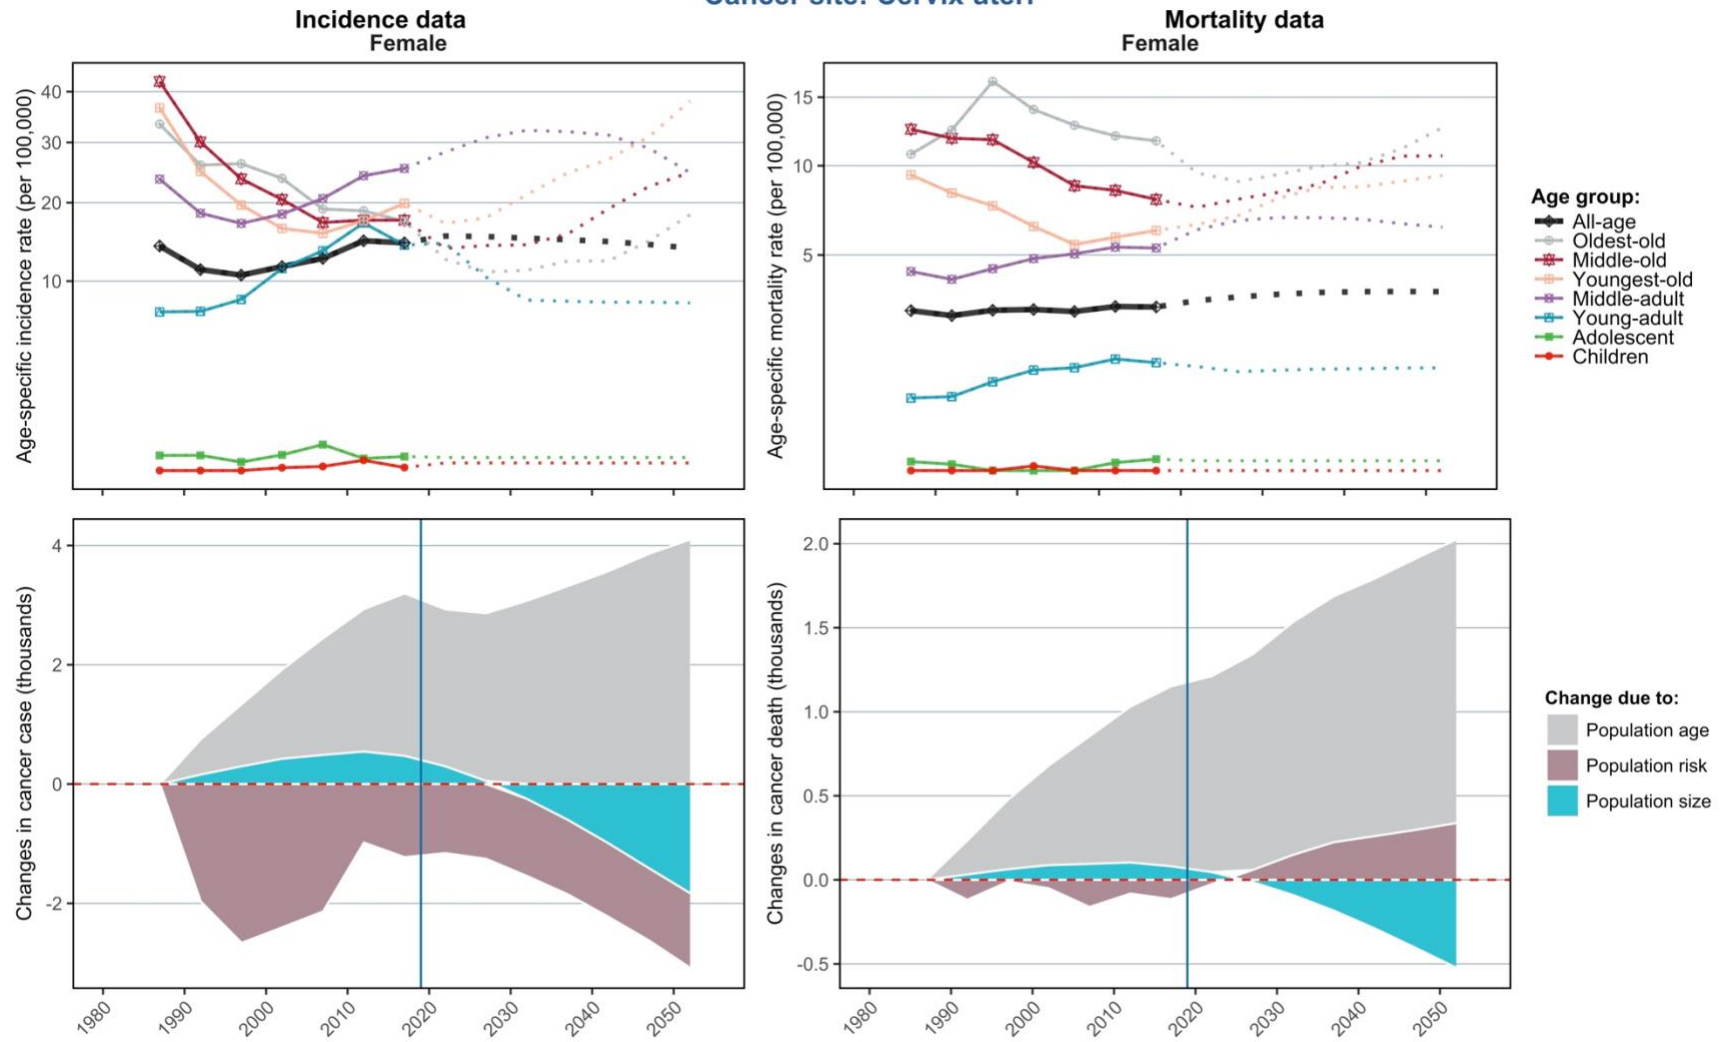

Figure S9. Projections of age-specific incidence and mortality rates and decomposed changes in new cases and deaths — Cervix uteri.

# Cancer site: Corpus uteri

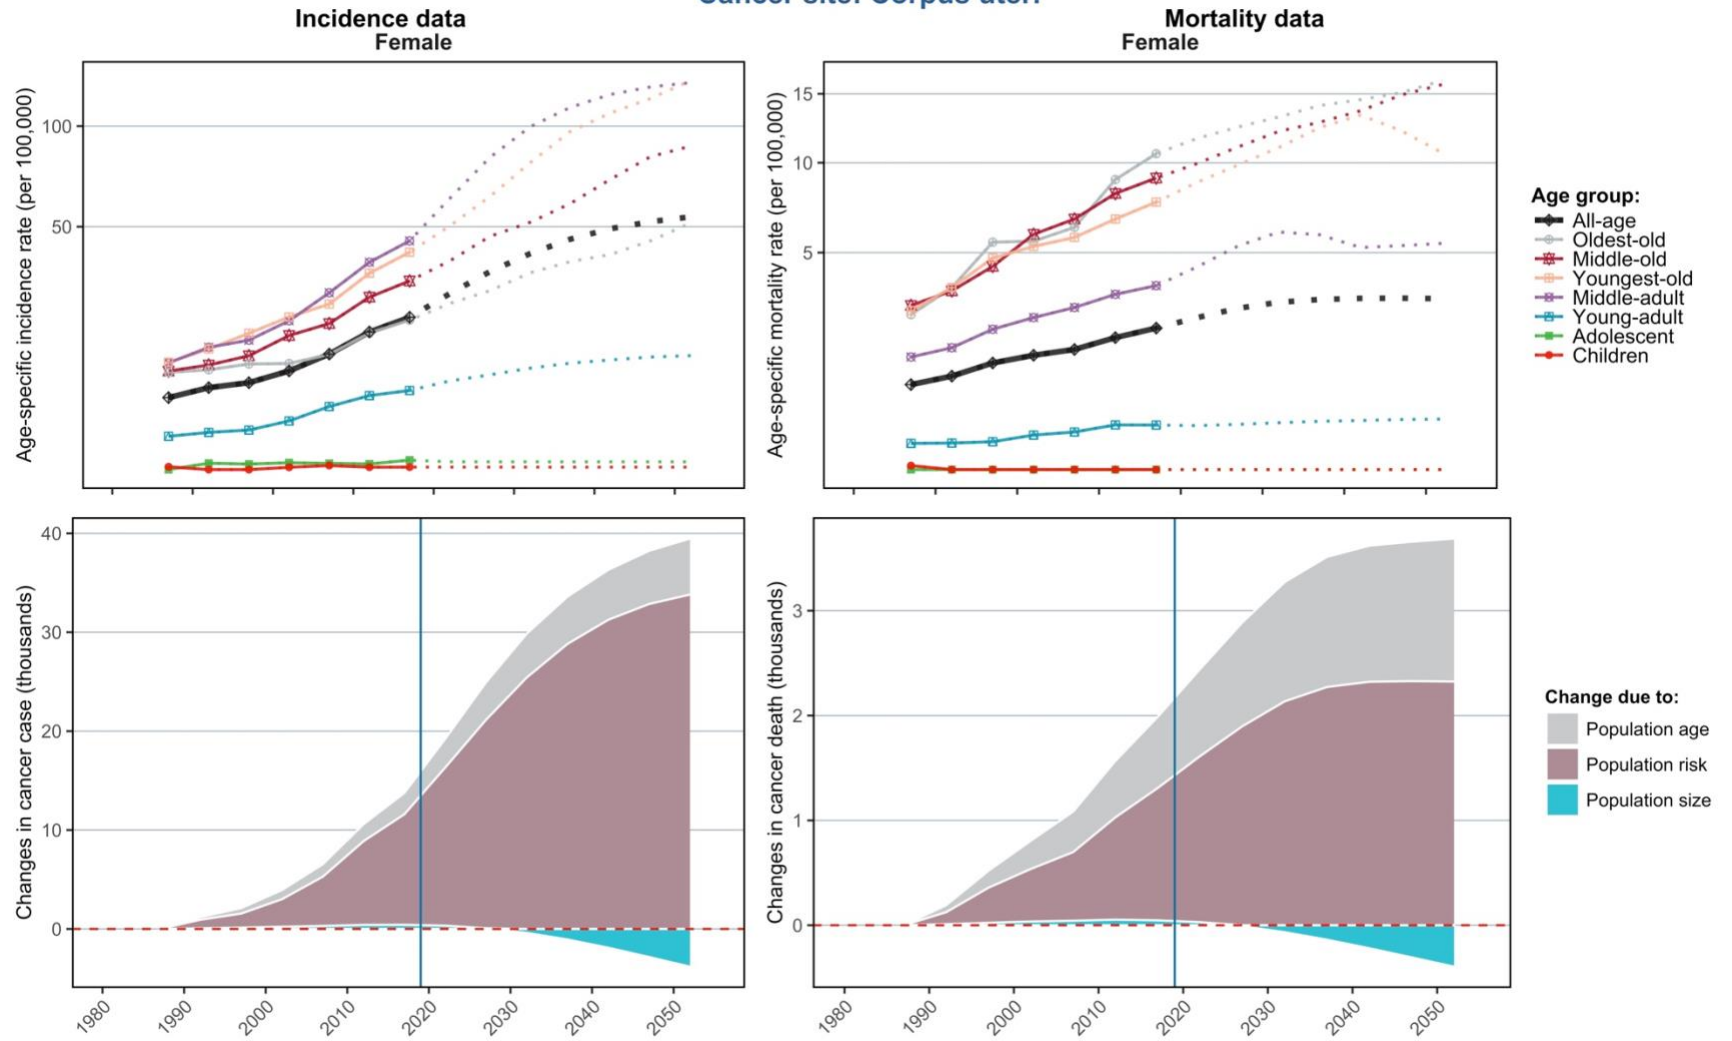

Figure S10. Projections of age-specific incidence and mortality rates and decomposed changes in new cases and deaths — Corpus uteri.

# Cancer site: Esophagus

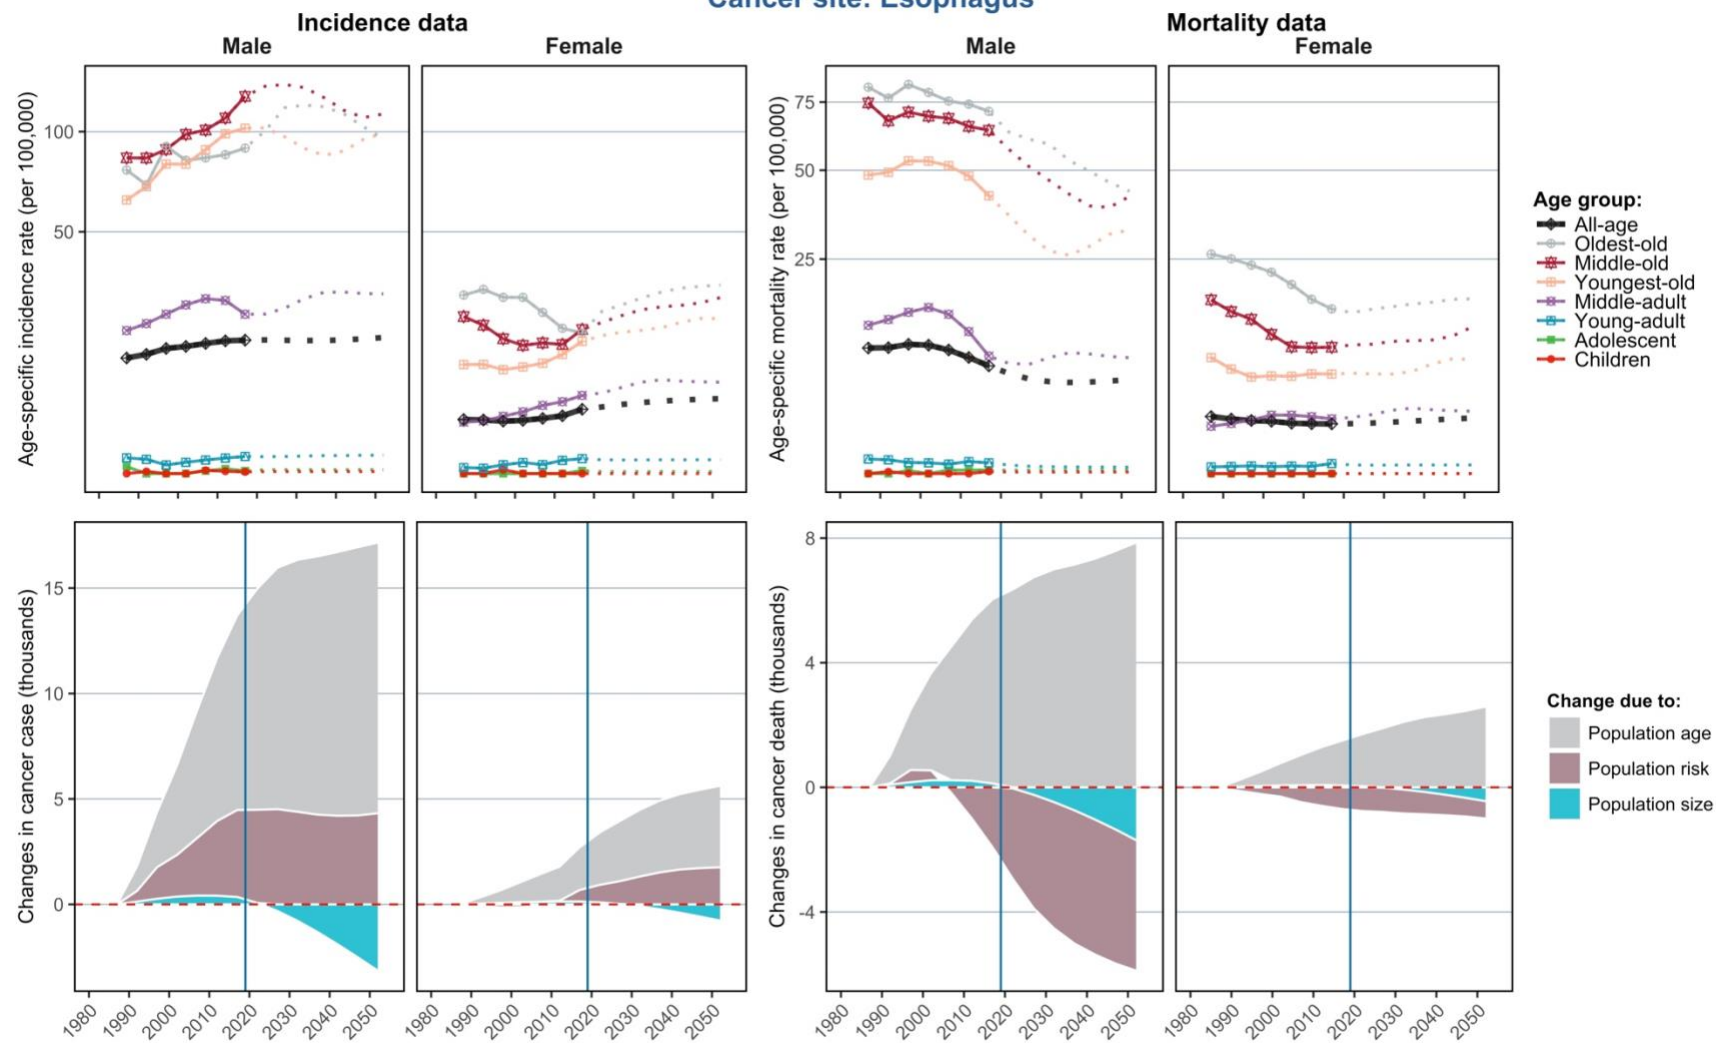

Figure S11. Projections of age-specific incidence and mortality rates and decomposed changes in new cases and deaths — Esophagus.

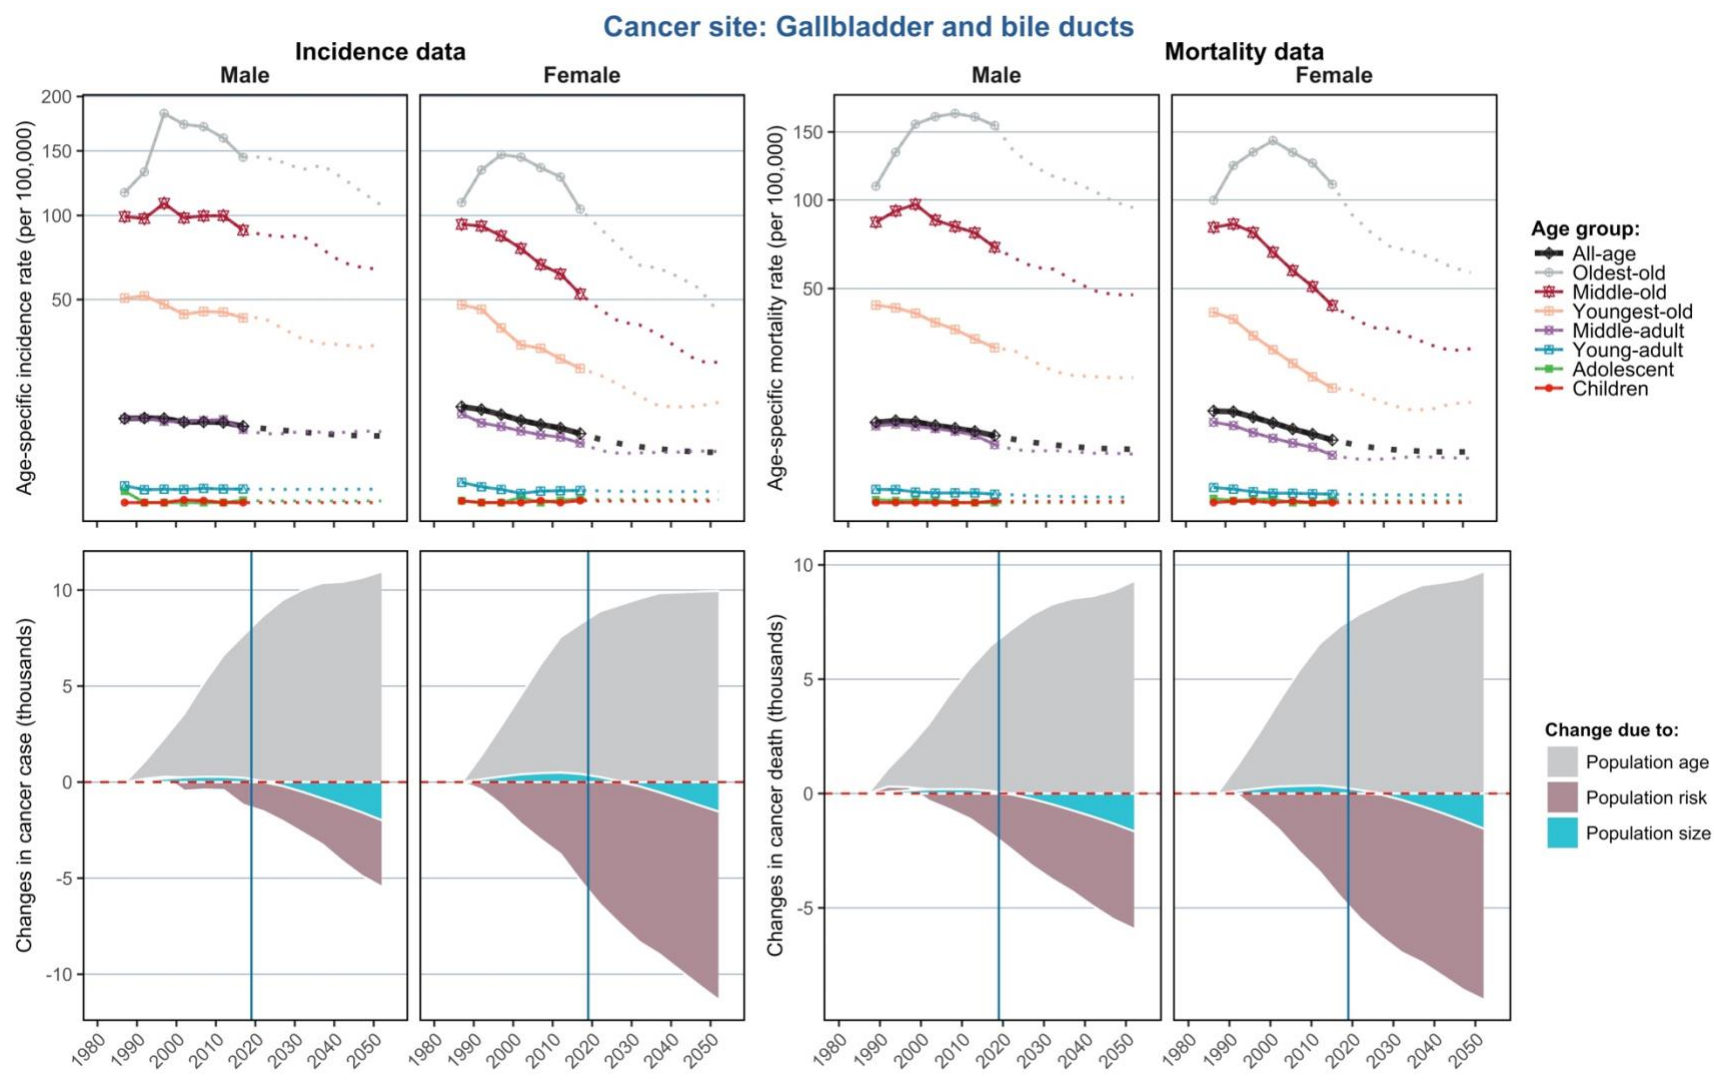

**Figure S12. Projections of age-specific incidence and mortality rates and decomposed changes in new cases and deaths — Gallbladder and bile ducts.**

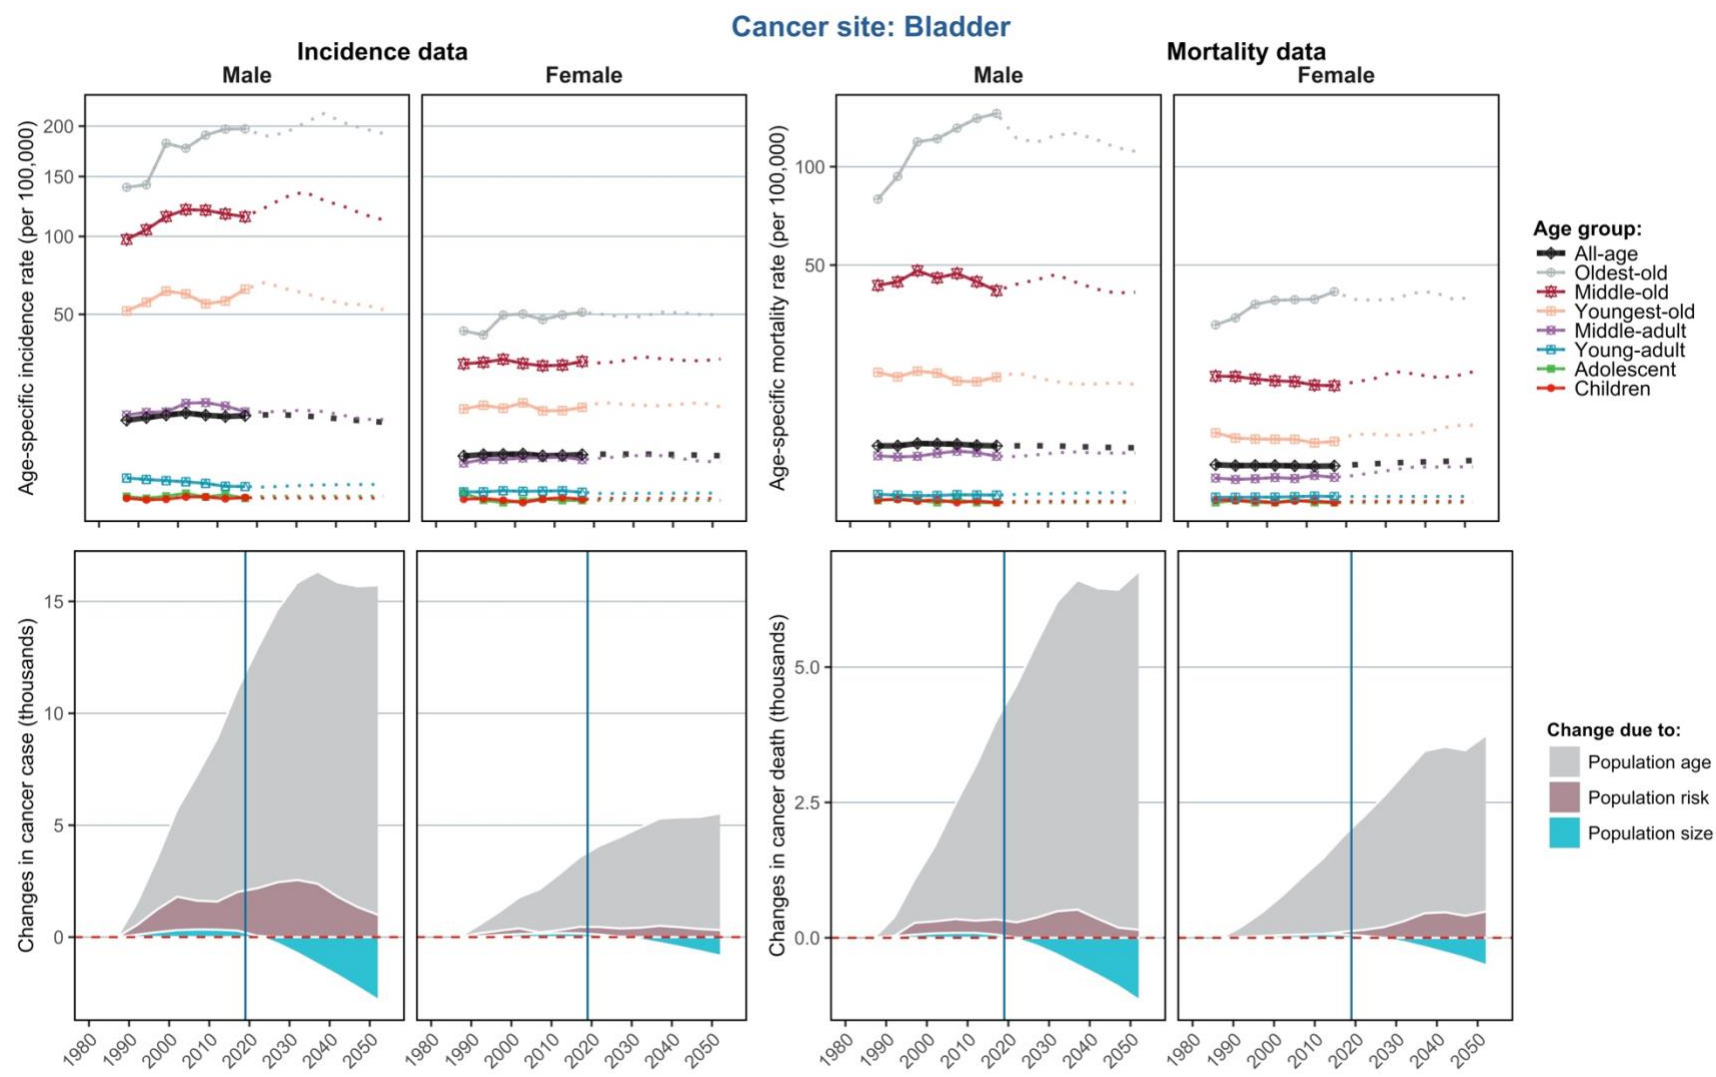

Figure S13. Projections of age-specific incidence and mortality rates and decomposed changes in new cases and deaths — Bladder.



### Cancer site: Kidney and other urinary organs

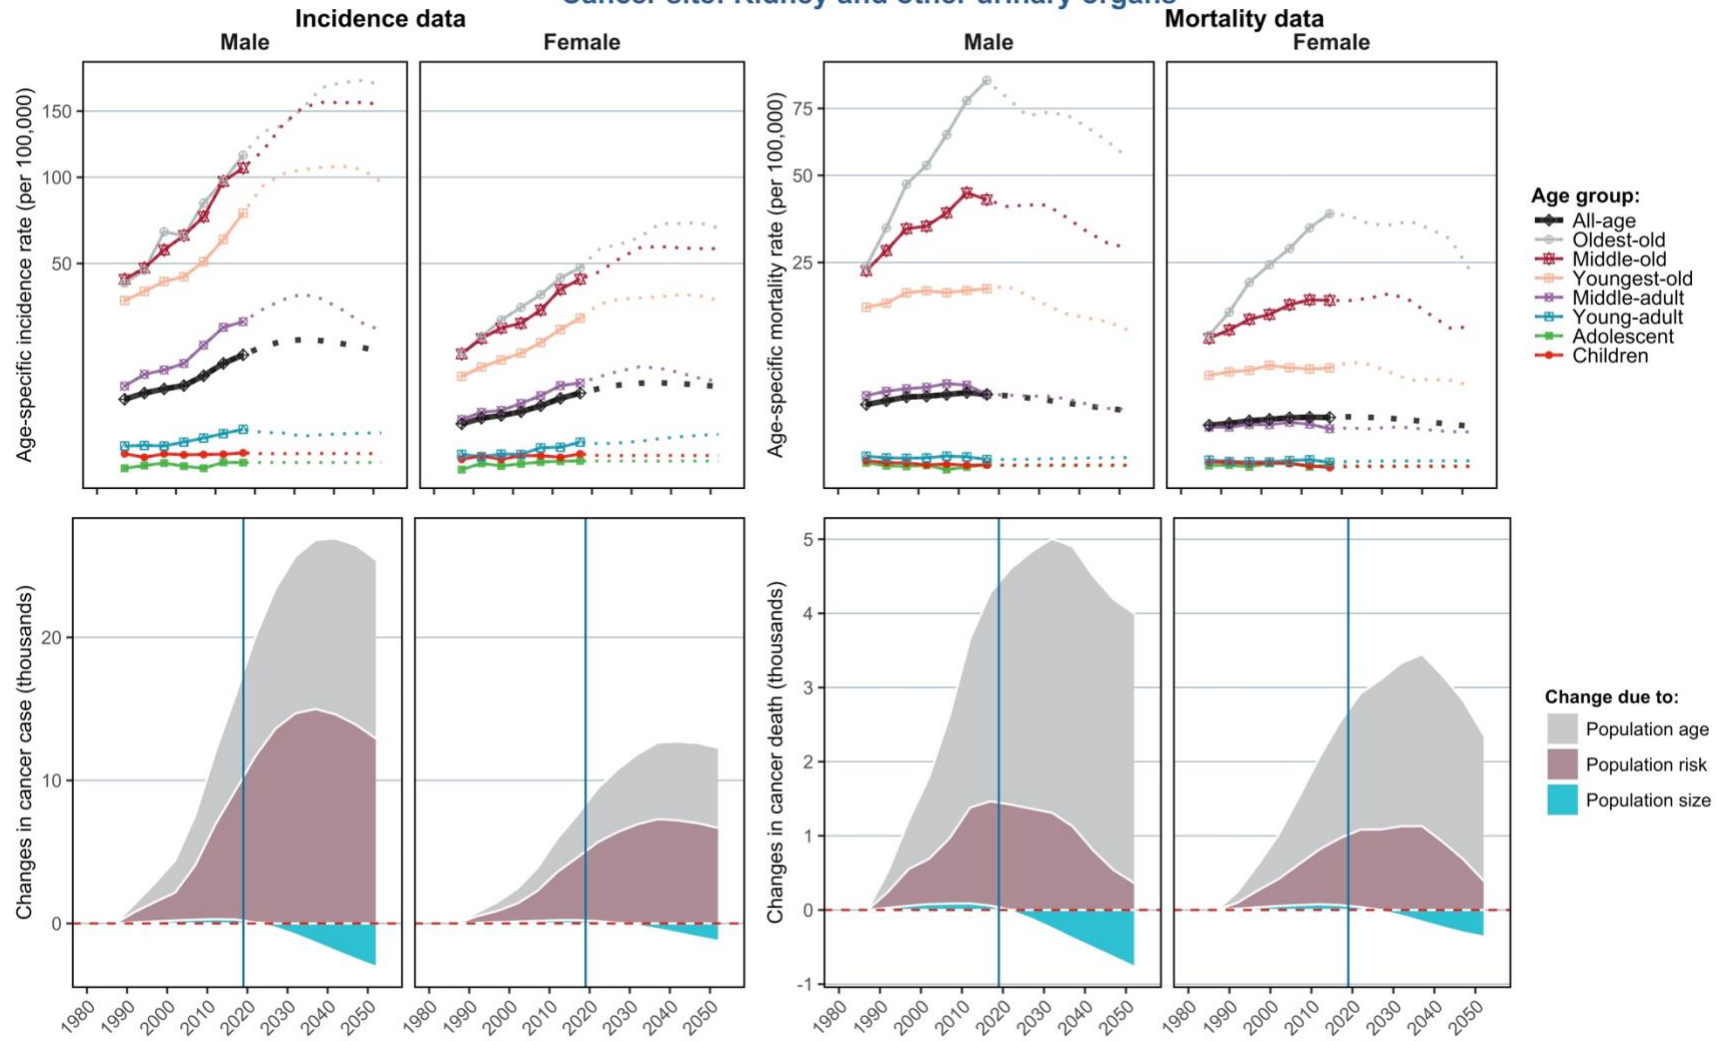

Figure S14. Projections of age-specific incidence and mortality rates and decomposed changes in new cases and deaths — Kidney and other urinary organs.

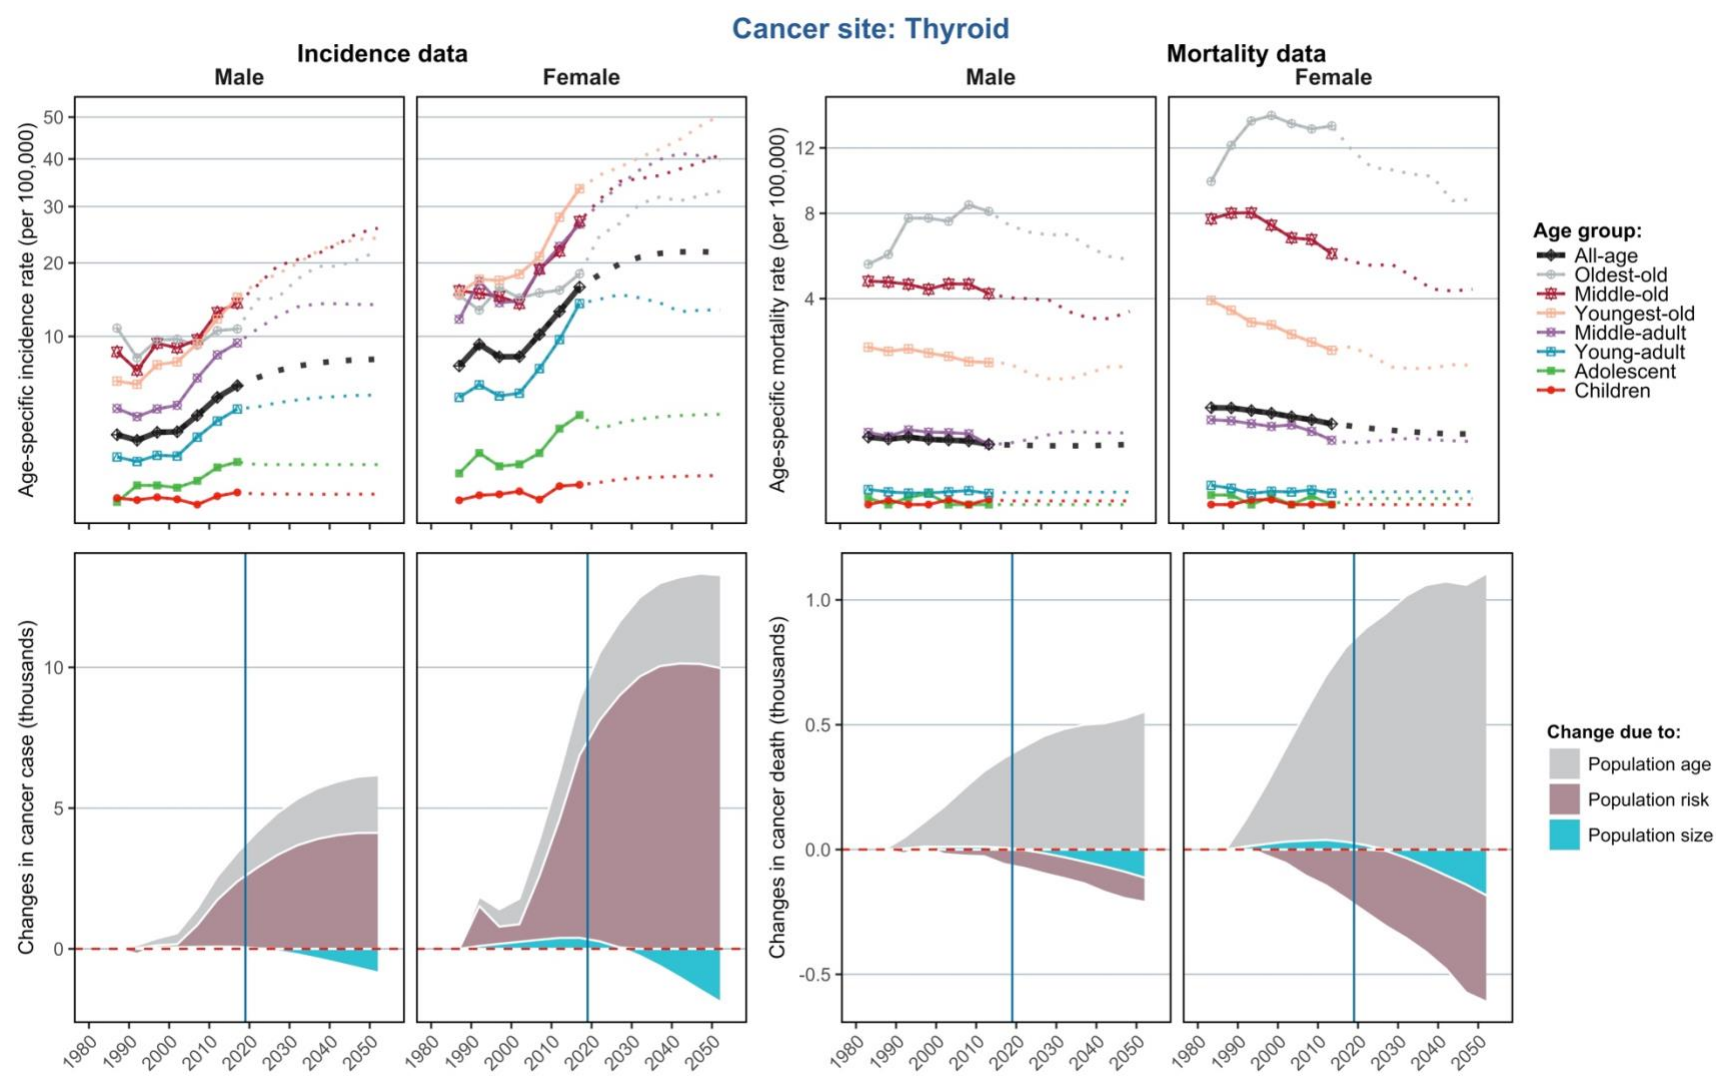

Figure S15. Projections of age-specific incidence and mortality rates and decomposed changes in new cases and deaths — Thyroid.



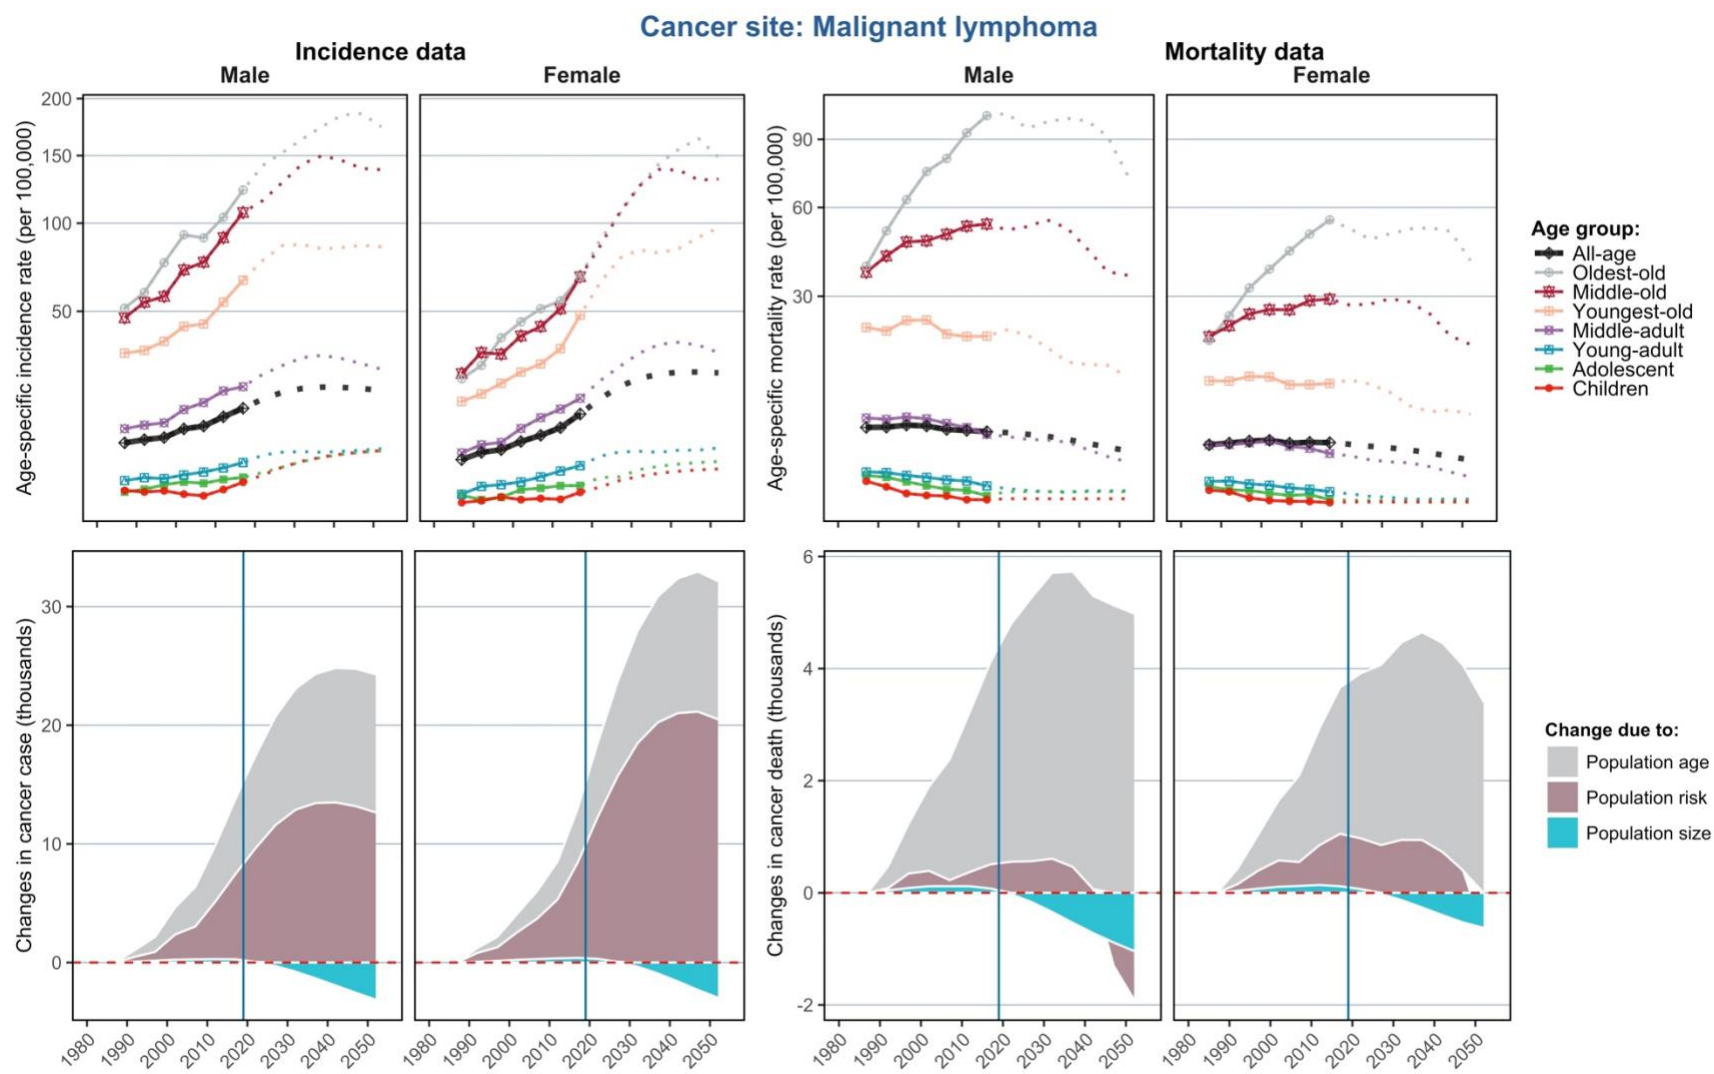

Figure S16. Projections of age-specific incidence and mortality rates and decomposed changes in new cases and deaths — Malignant lymphoma.

# Cancer site: Ovary

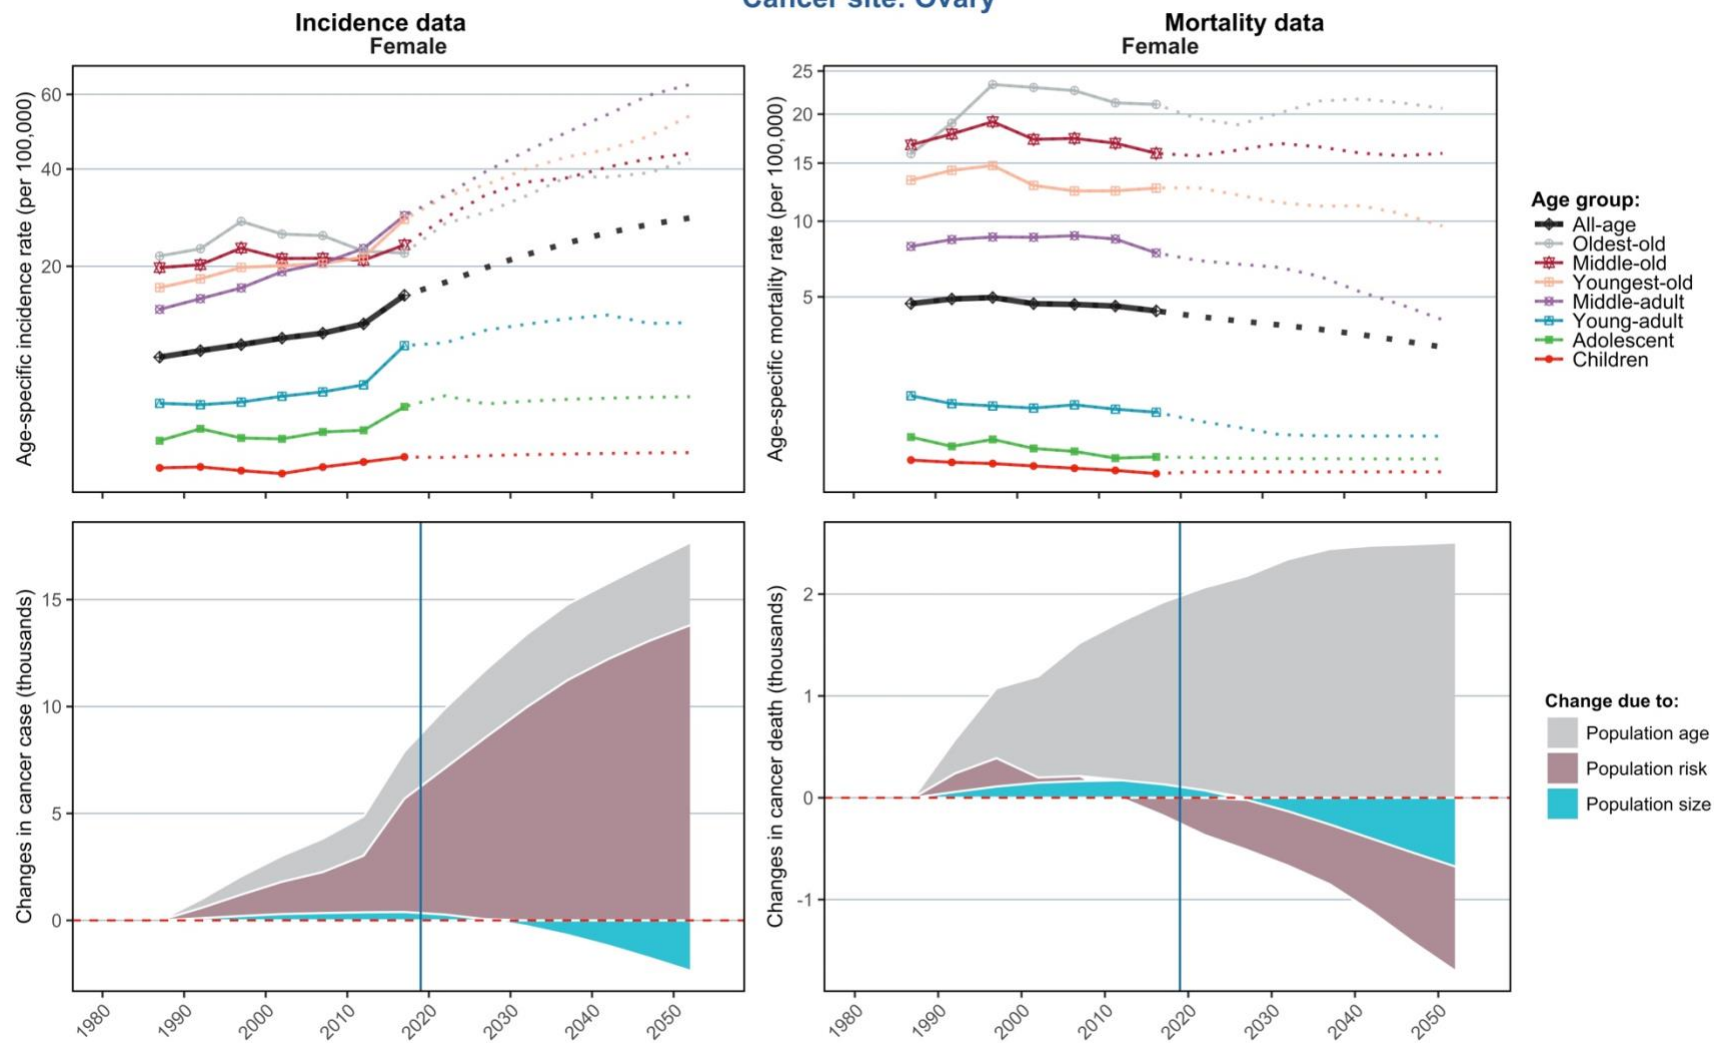

Figure S17. Projections of age-specific incidence and mortality rates and decomposed changes in new cases and deaths — Ovary.

# Cancer site: Oral cavity and pharynx

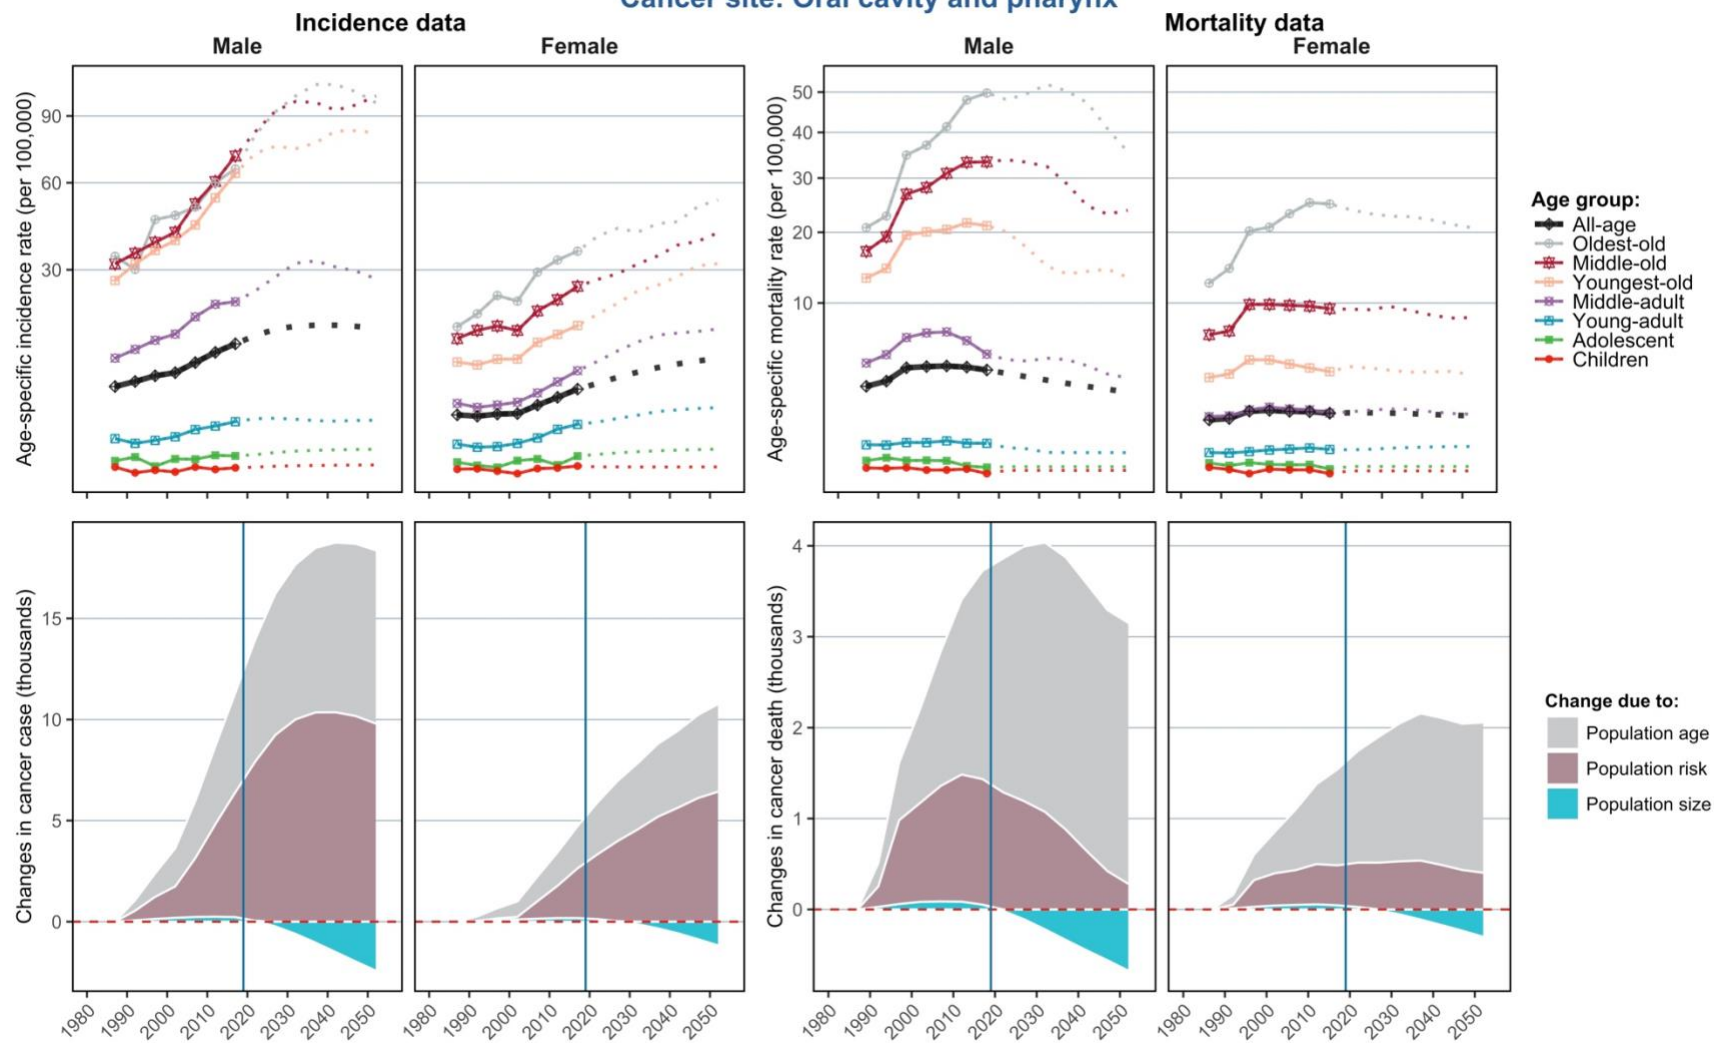

Figure S18. Projections of age-specific incidence and mortality rates and decomposed changes in new cases and deaths — Oral cavity and pharynx.

# Cancer site: Larynx

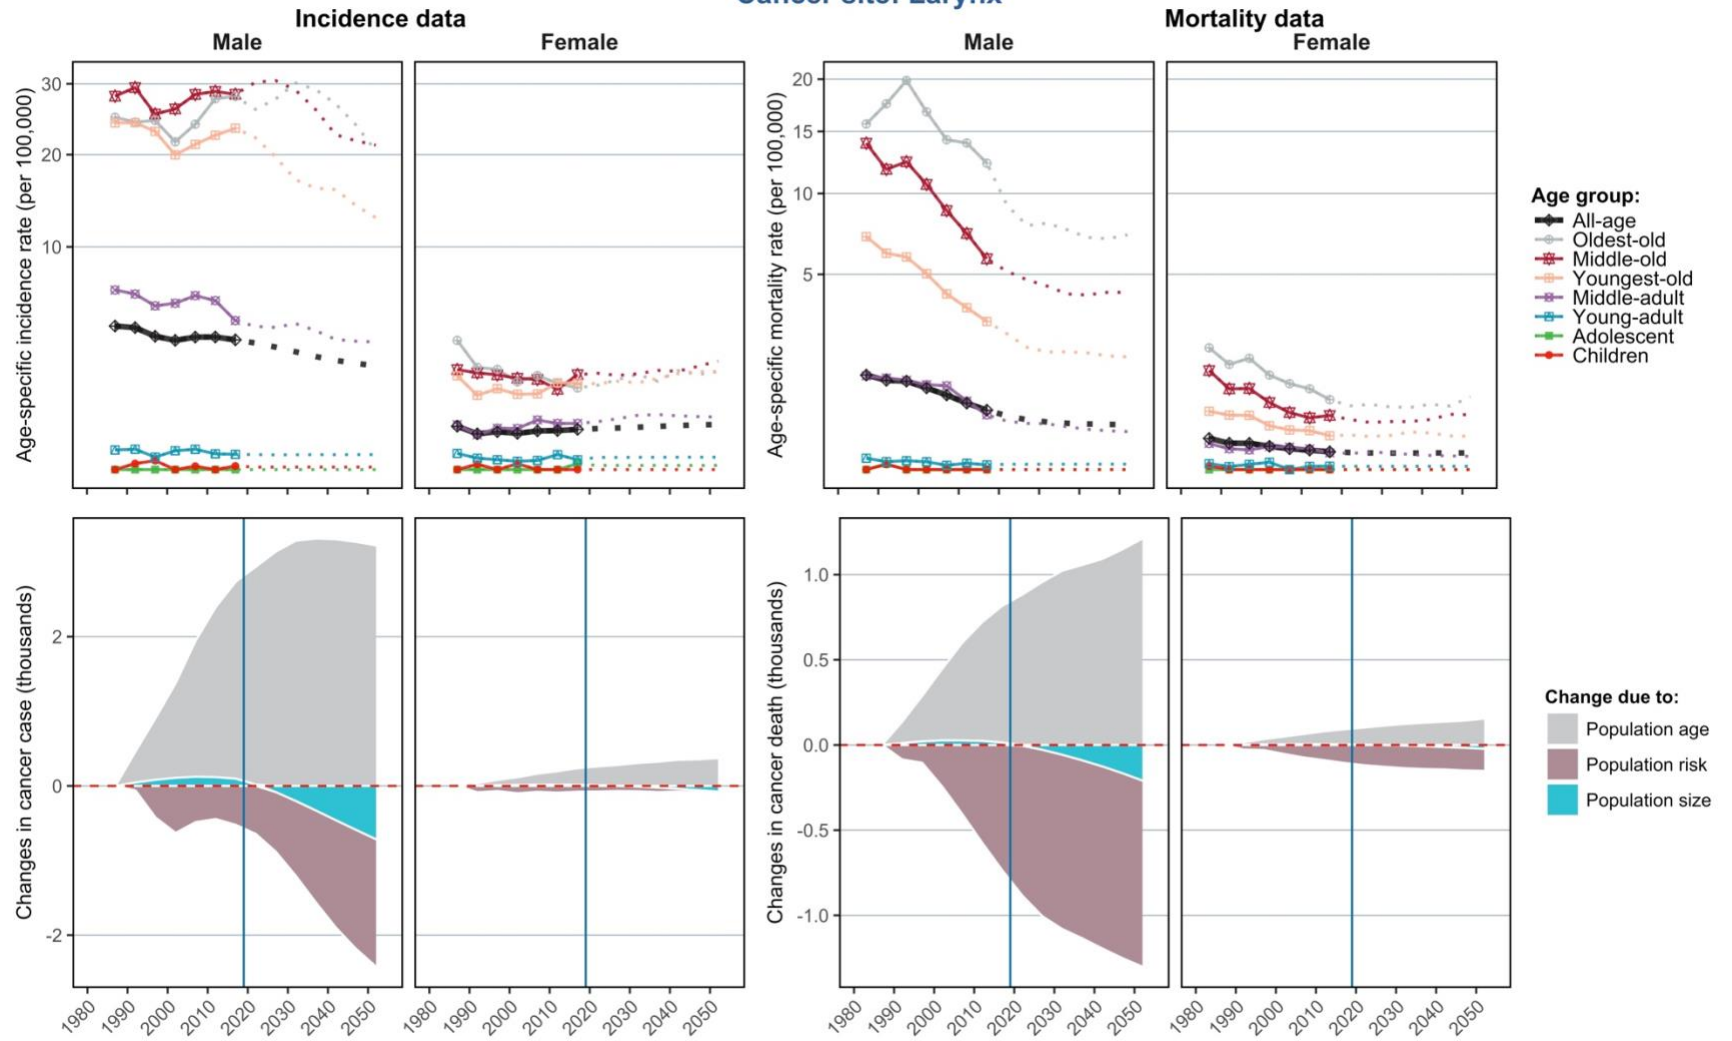

Figure S19. Projections of age-specific incidence and mortality rates and decomposed changes in new cases and deaths — Larynx.

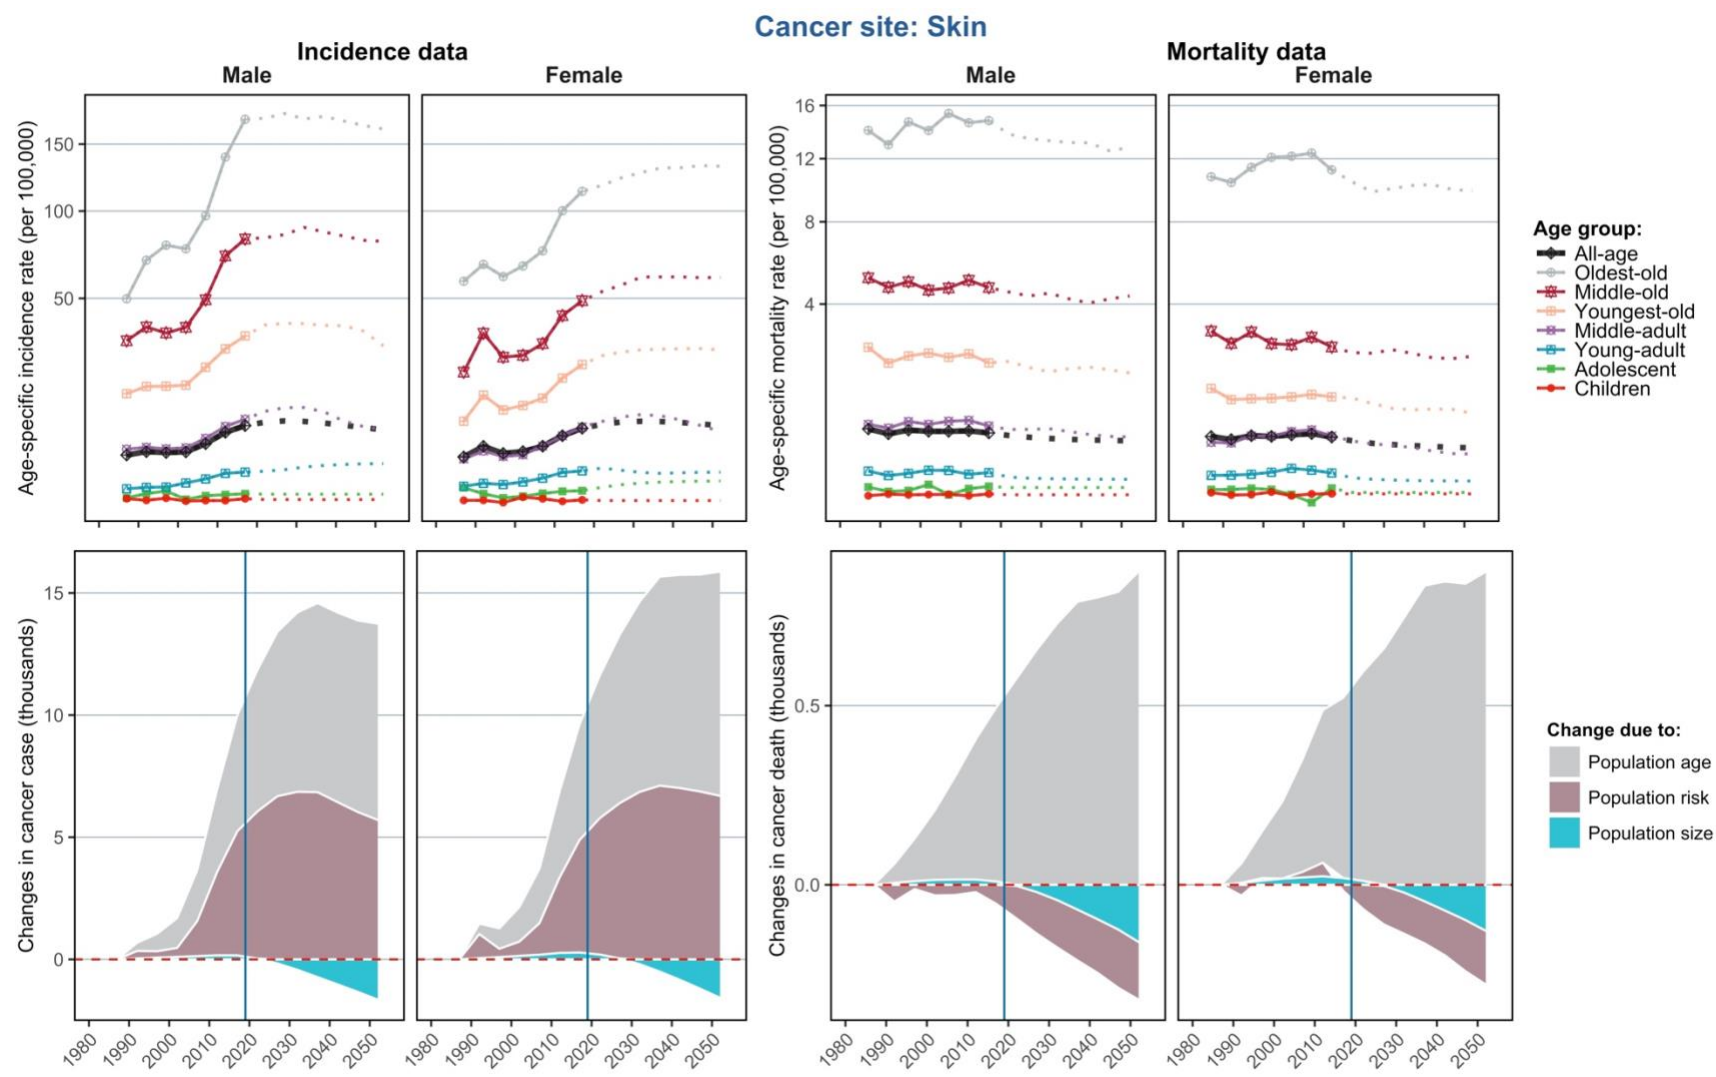



# Cancer site: Brain, nervous system

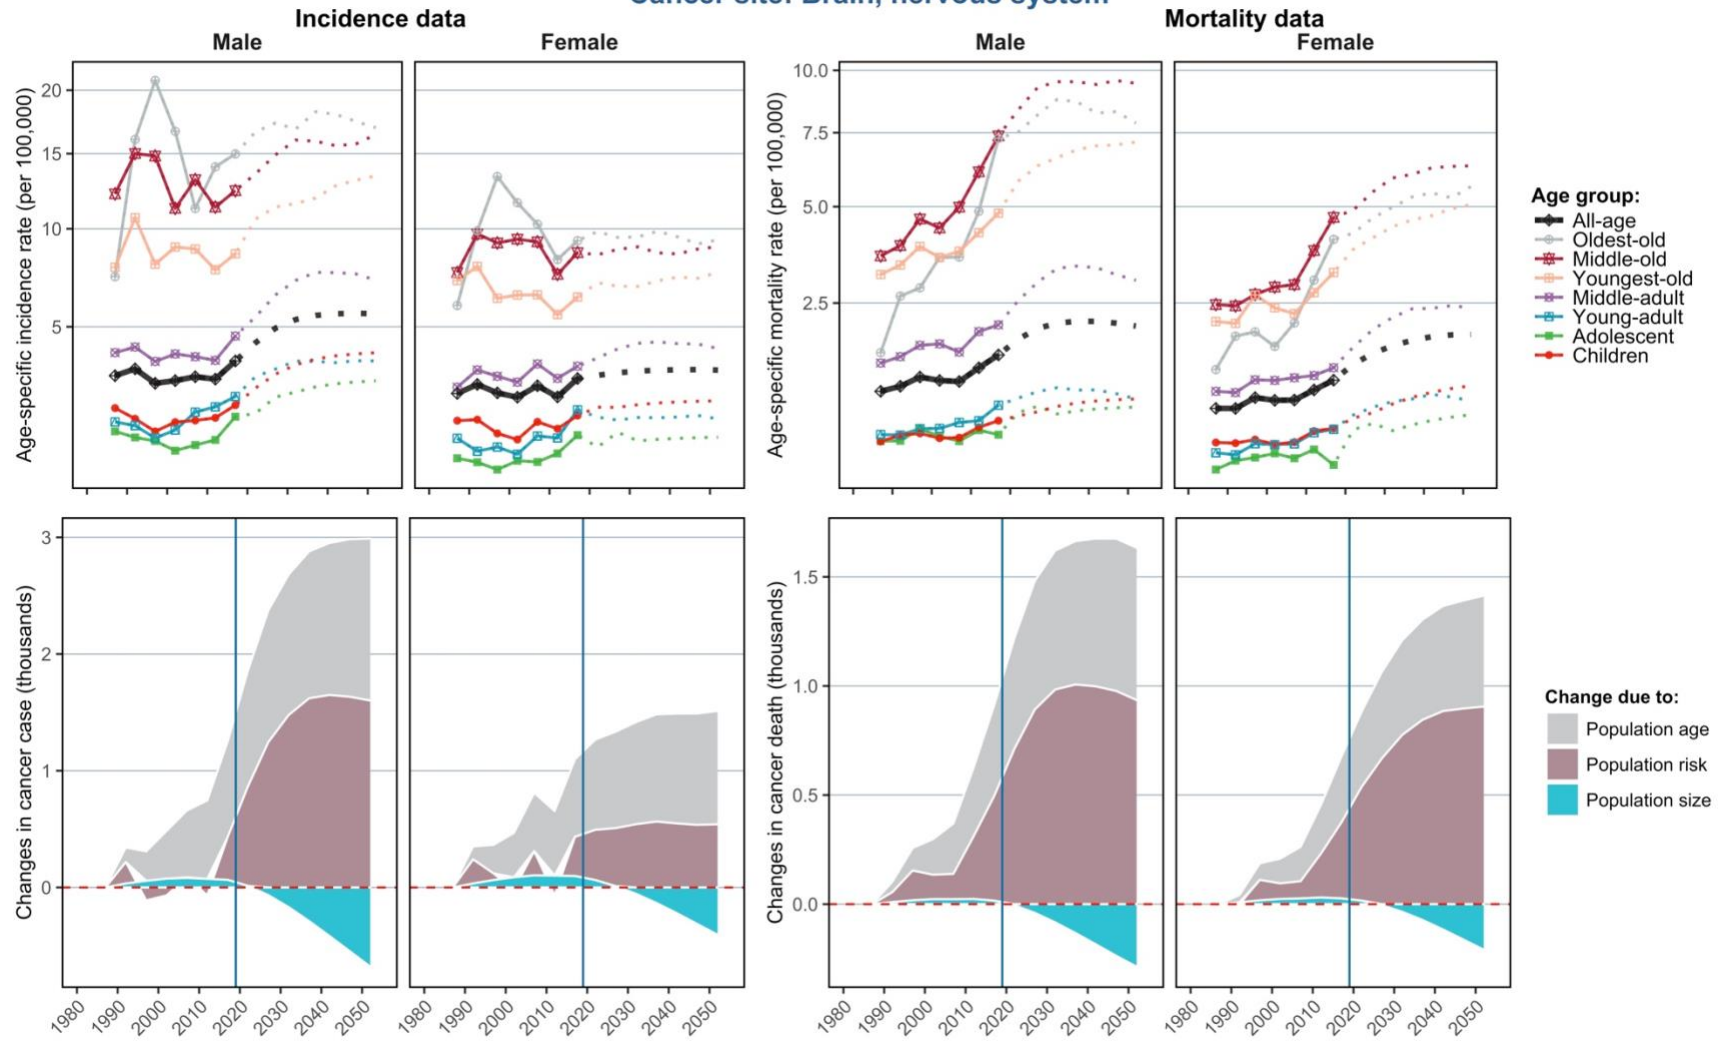

Figure S21. Projections of age-specific incidence and mortality rates and decomposed changes in new cases and deaths — Brain, nervous system.

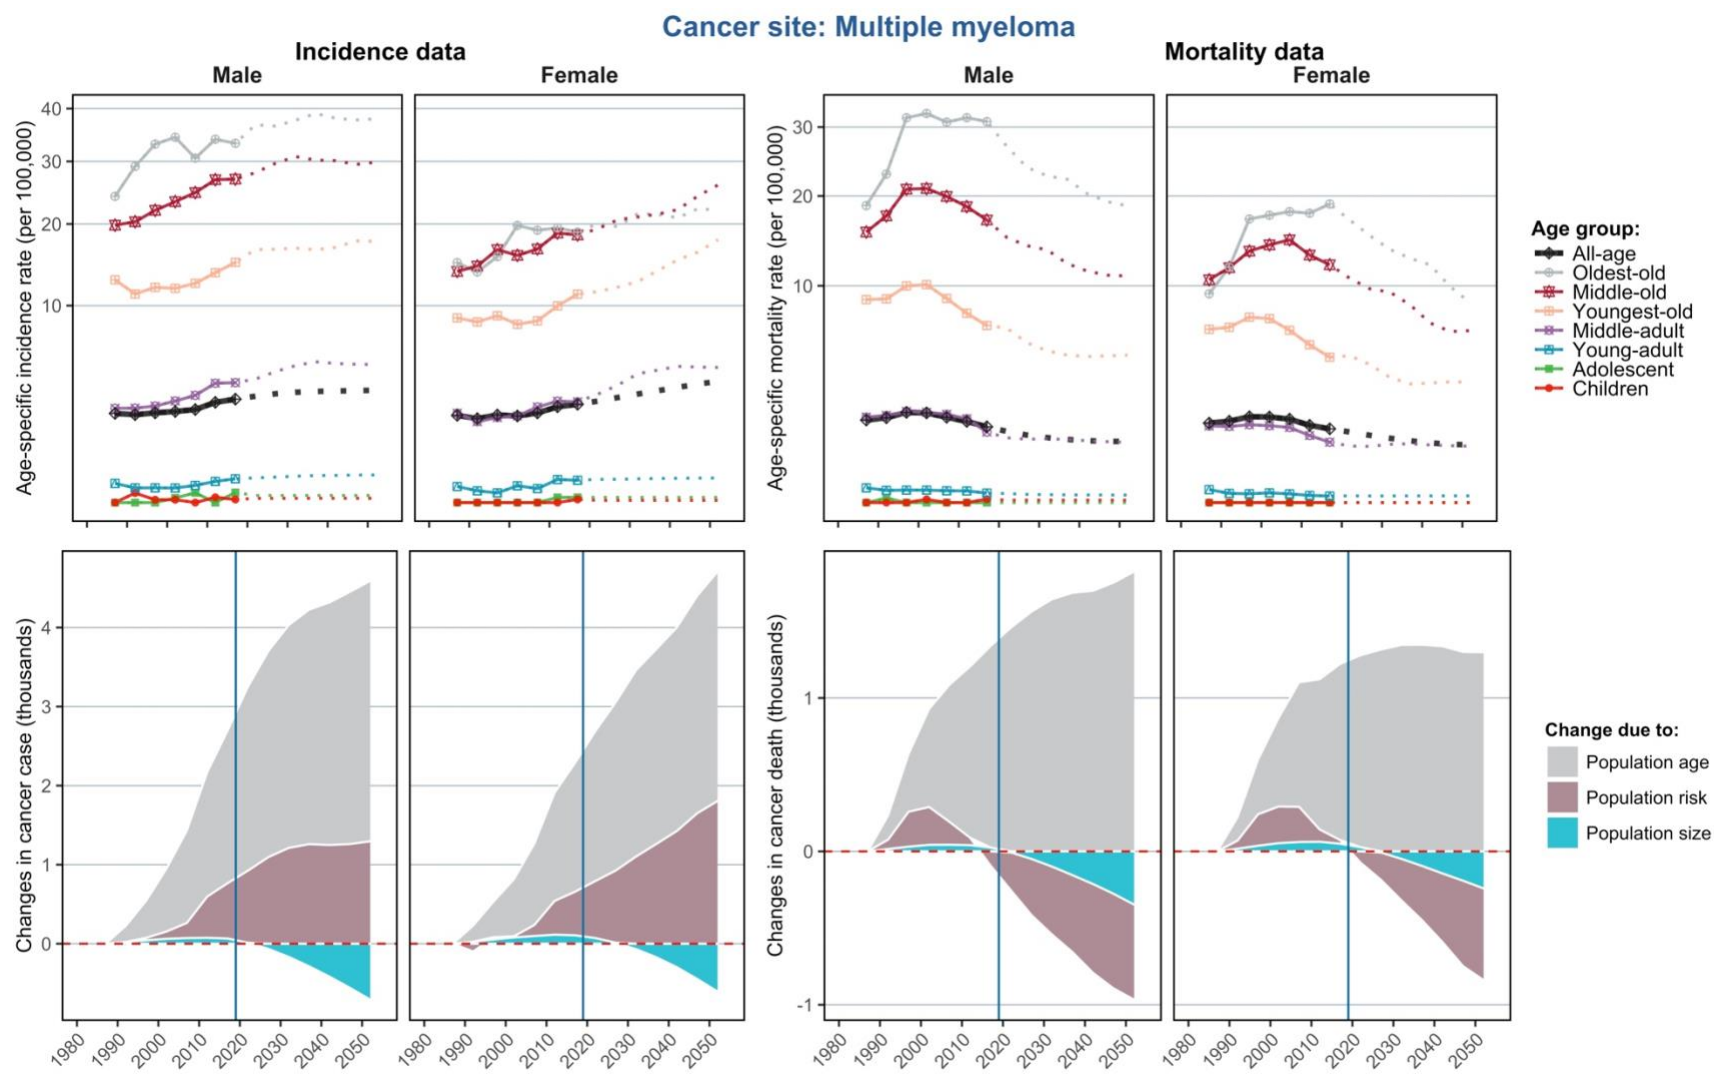

**Figure S22. Projections of age-specific incidence and mortality rates and decomposed changes in new cases and deaths — Multiple myeloma.**

### Cancer site: Leukemia

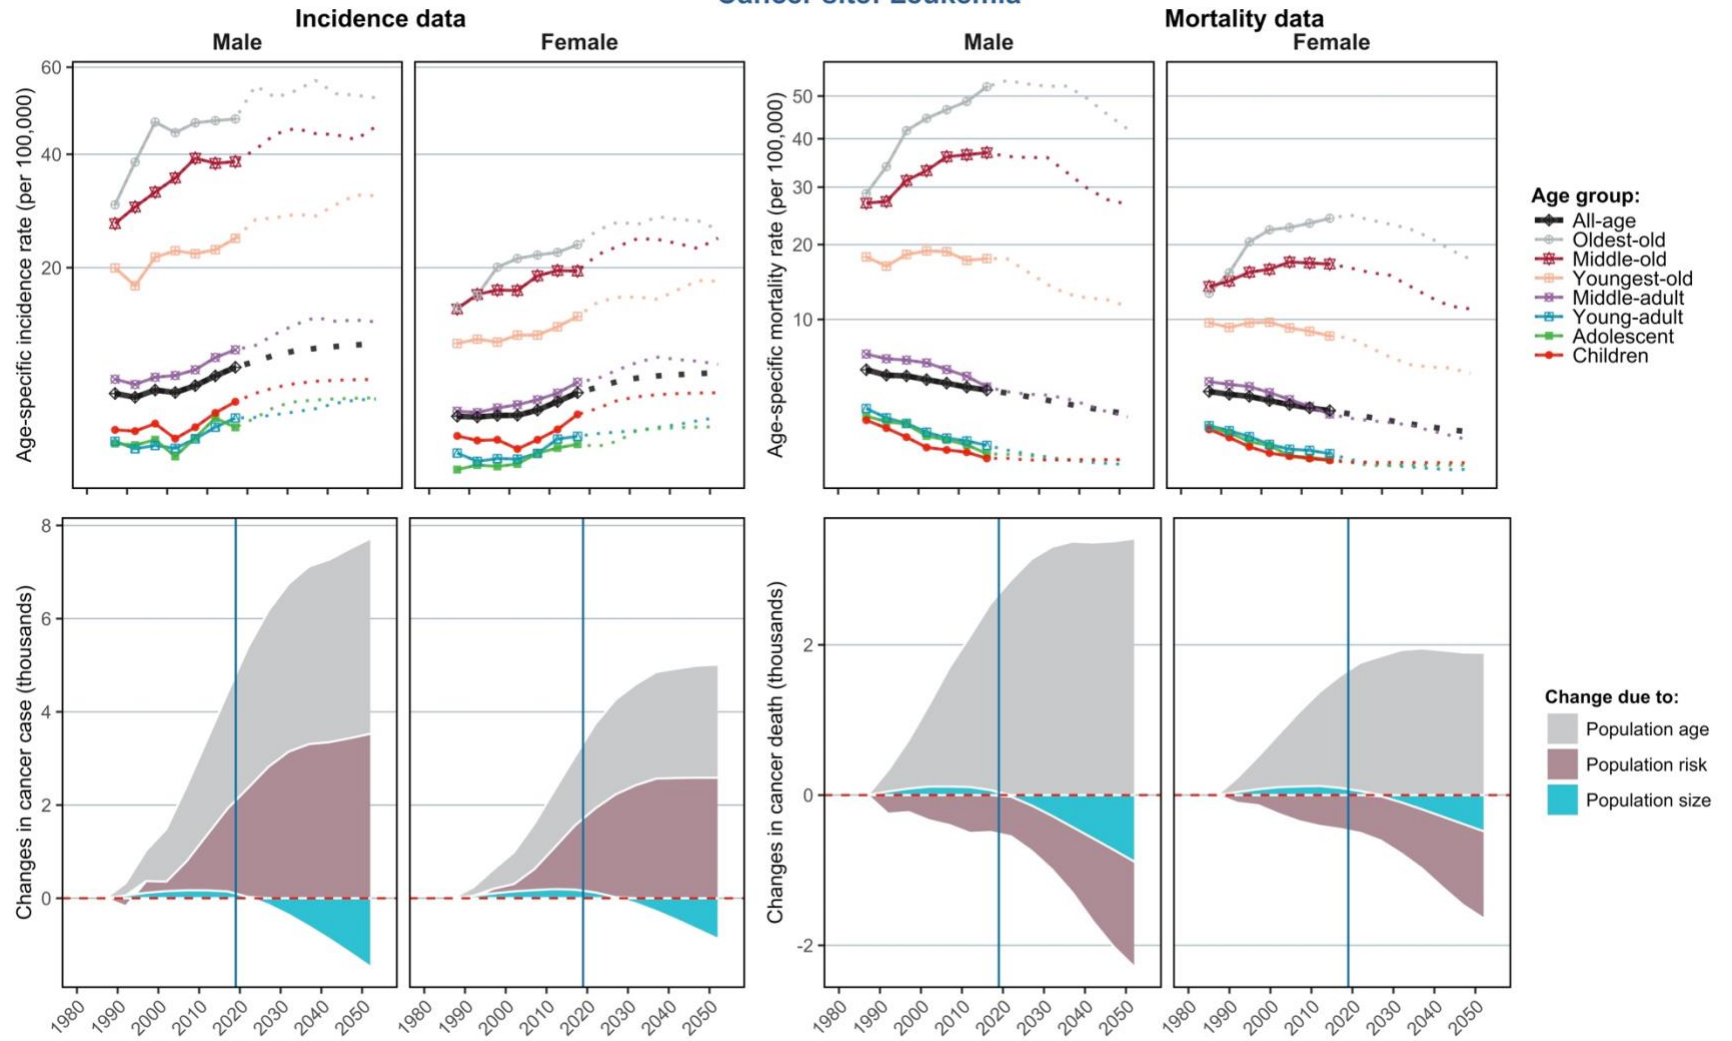

Figure S23. Projections of age-specific incidence and mortality rates and decomposed changes in new cases and deaths — Leukemia.



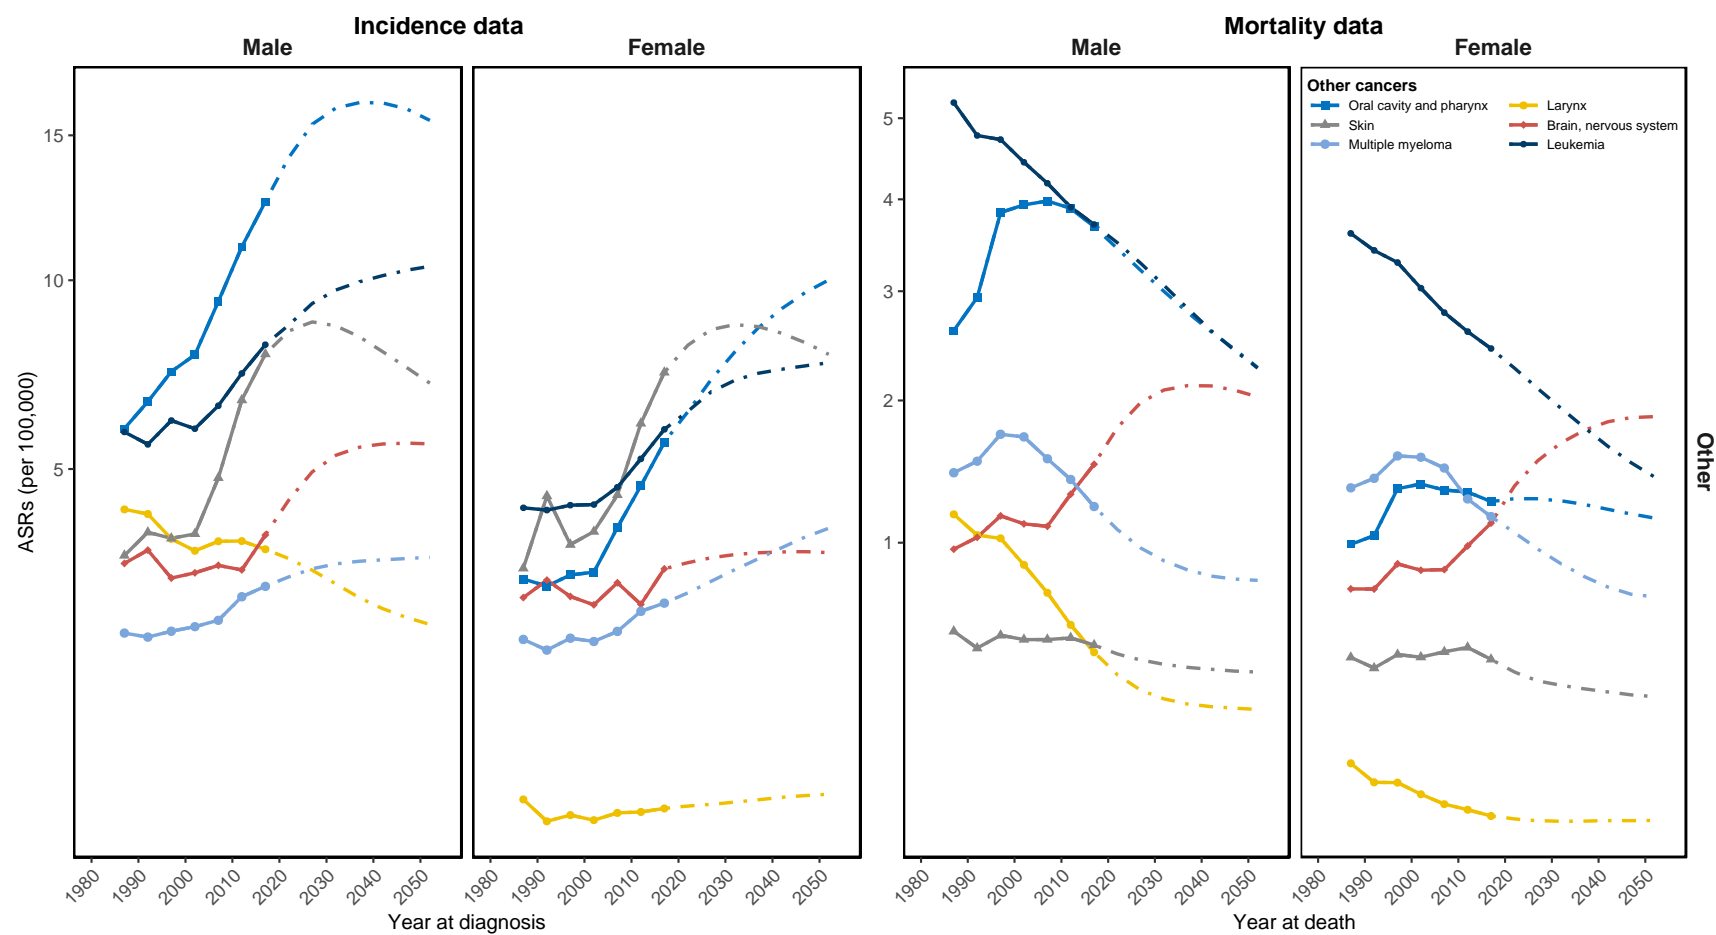

Figure S24. Projections of age-standardized incidence and mortality rates by genders for other cancer sites.

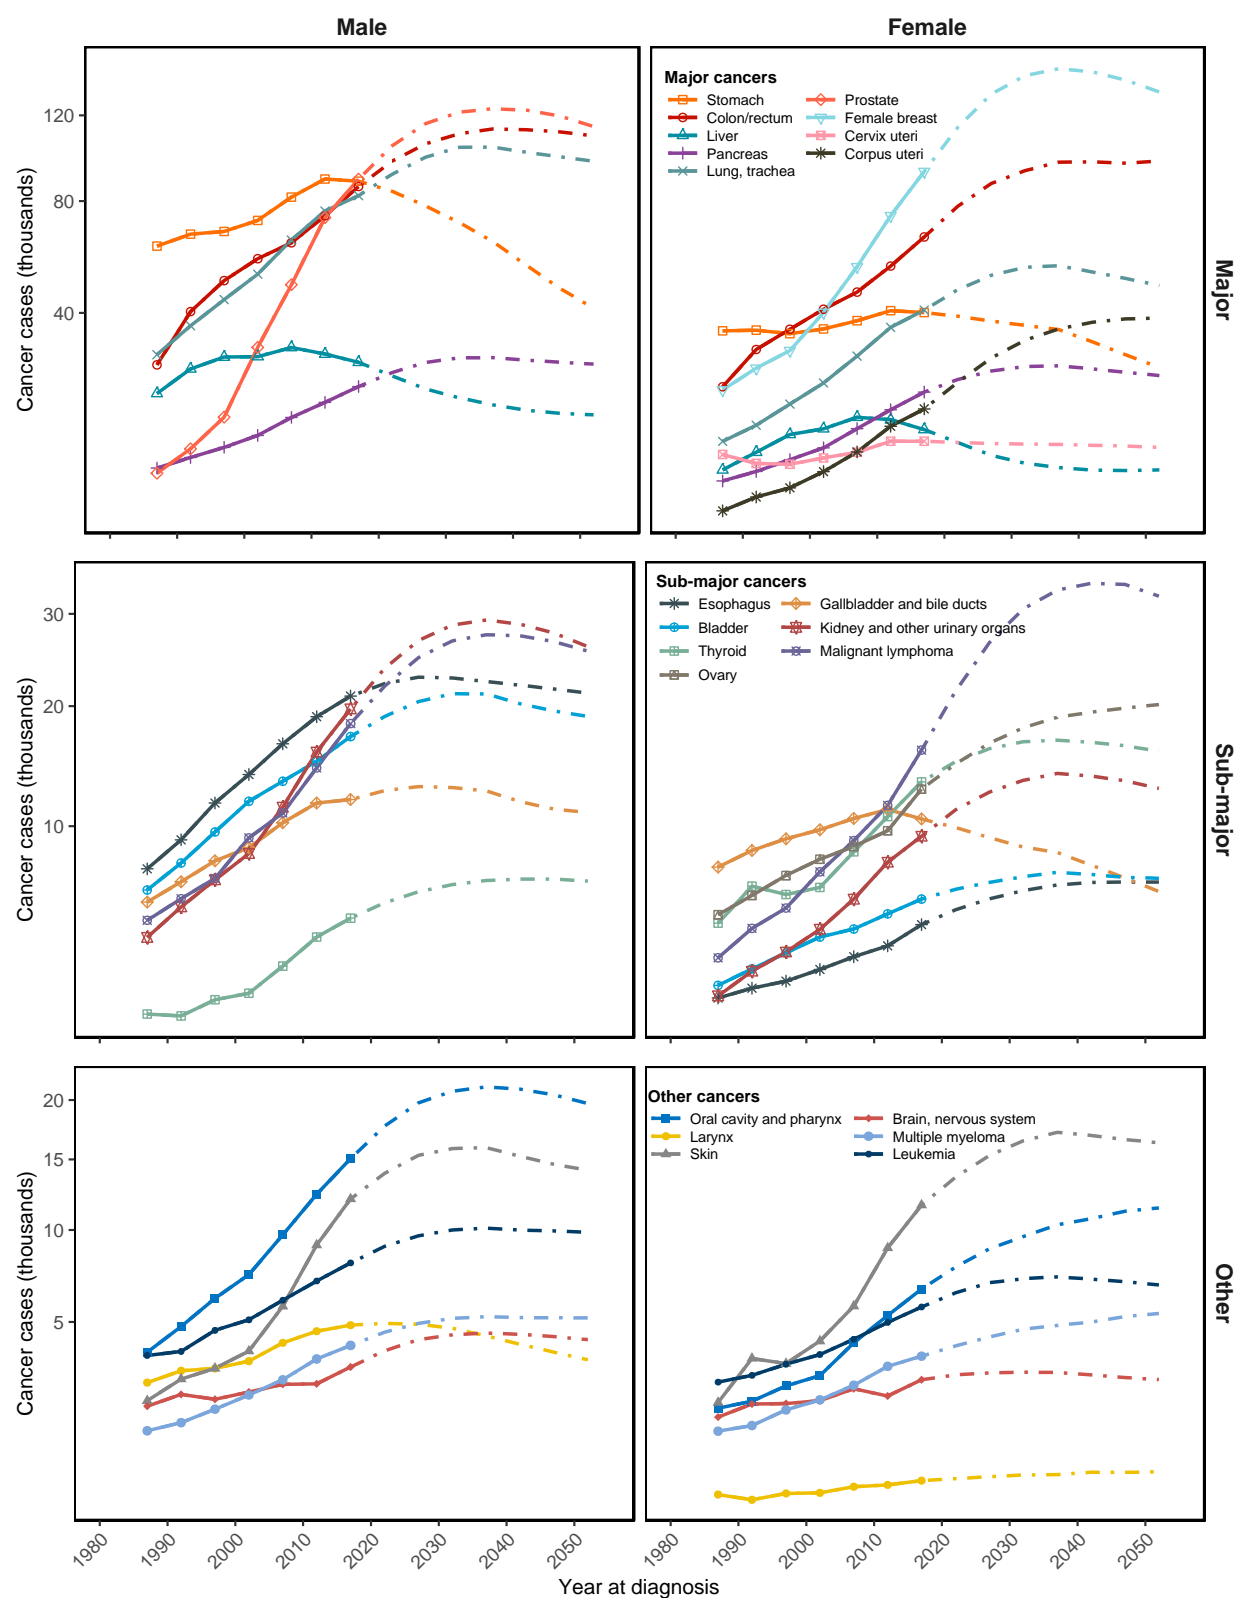

Figure S25. Projections of new cancer cases by genders for all cancer sites.

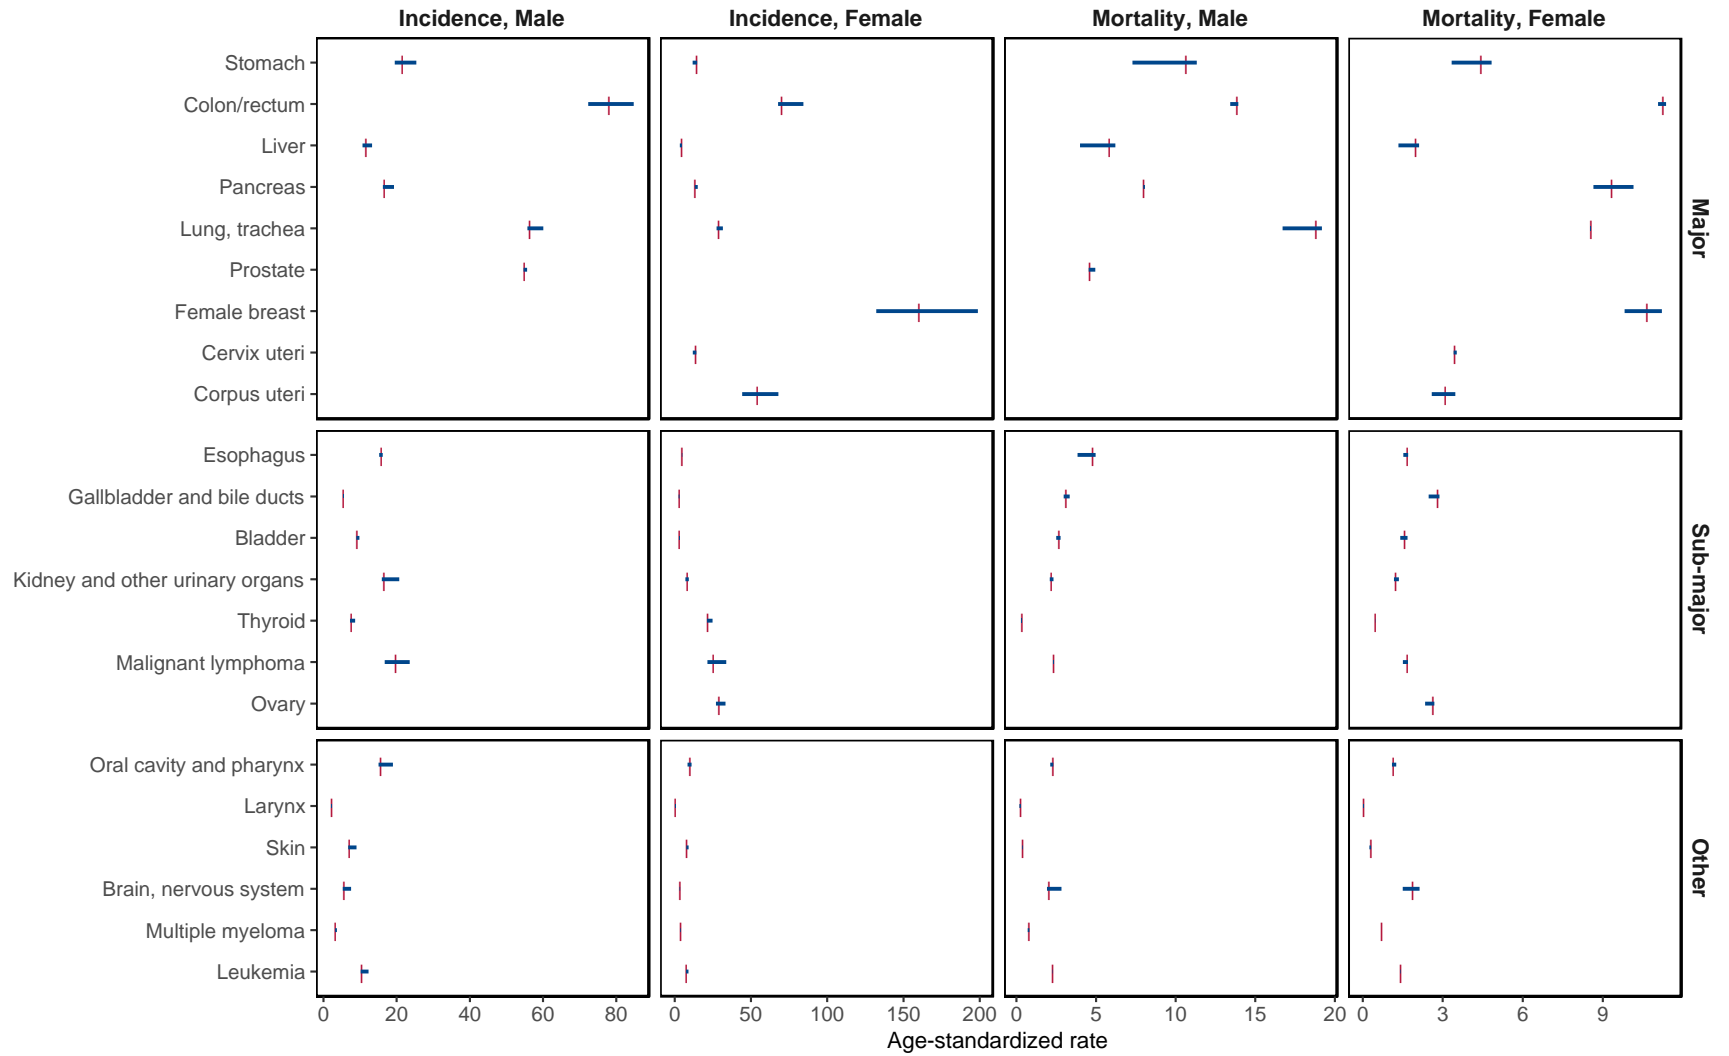

Figure S26. Sensitivity analysis of drift attenuation in ASR in 2050–2054.

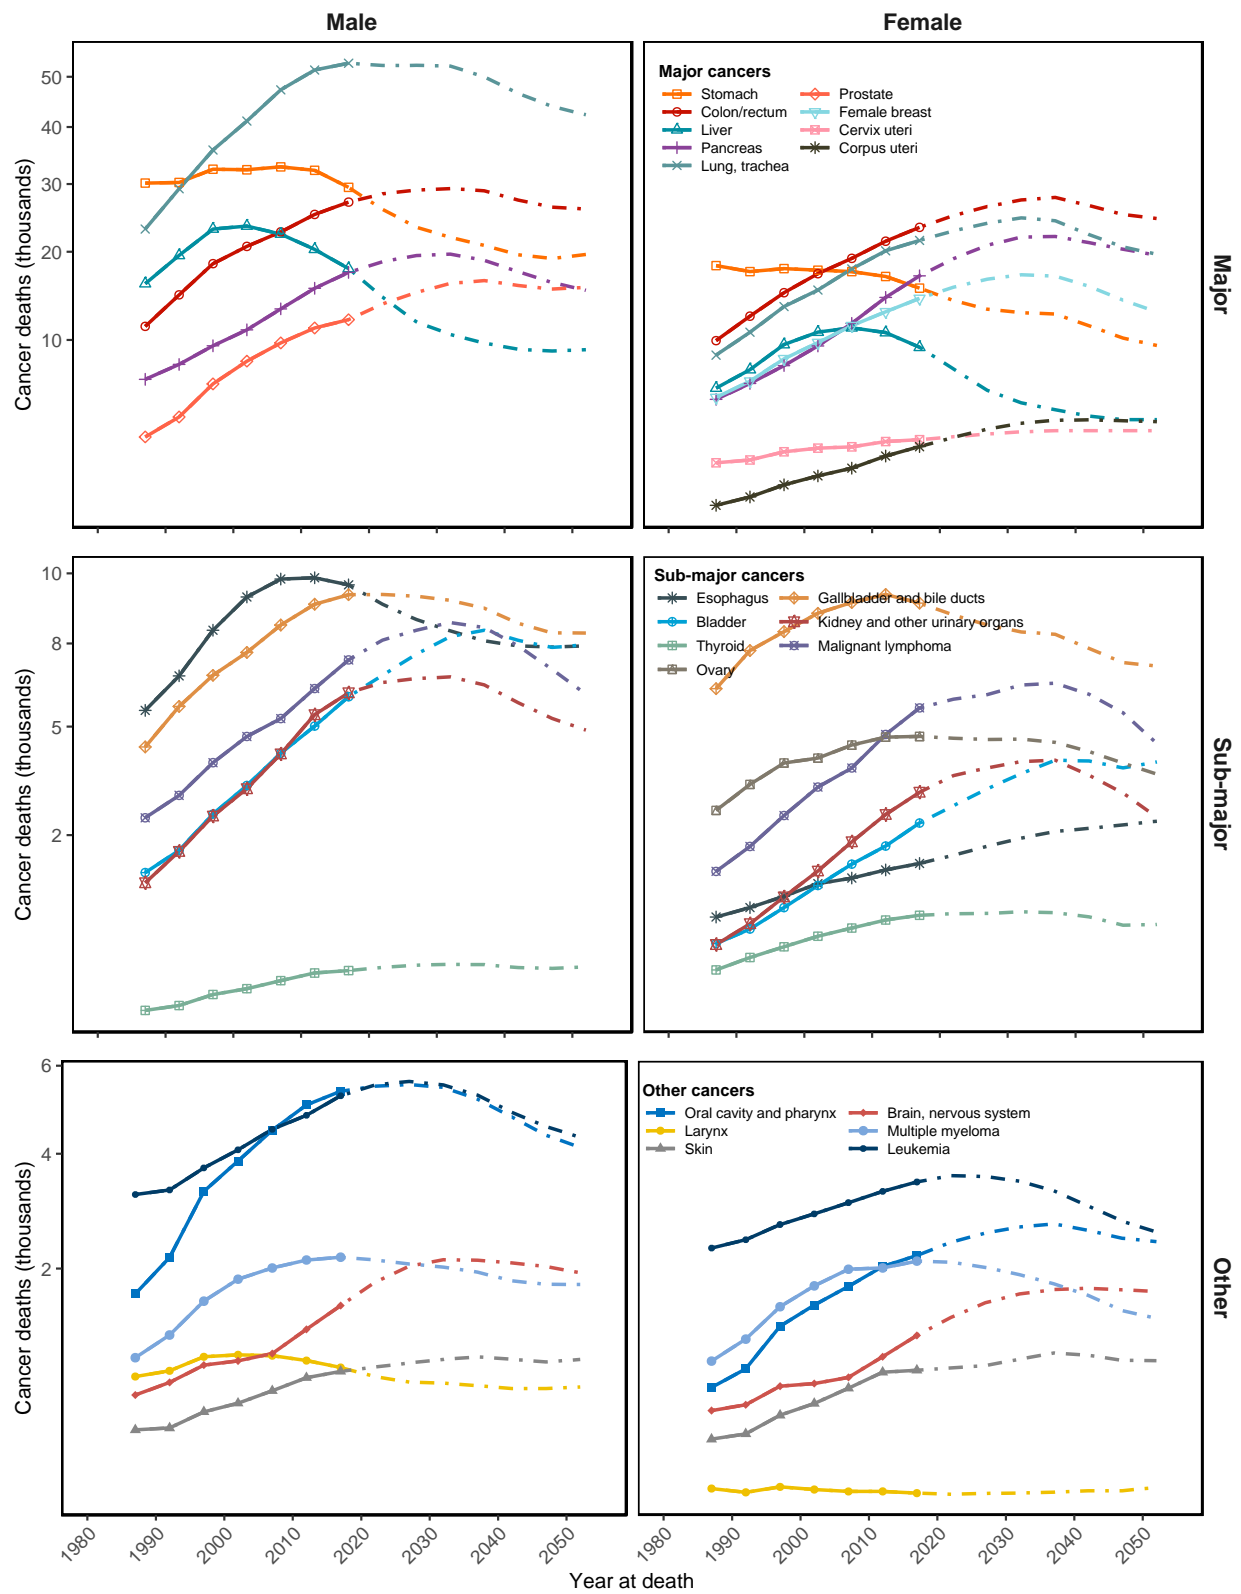

Figure S27. Projections of new cancer deaths by genders for all cancer sites.
